# Supplementary material
Source: PubMed Central journal article supplement (PMC2574699)
Supplement: NIHMS58122-supplement-2.pdf [file NIHMS58122-supplement-2.pdf]

Supporting Information

**Conformationally Constrained Analogues of Diacylglycerol. 30. An Investigation of Diacylglycerol-lactones Containing Heteroaryl Groups Reveals Compounds with High Selectivity for Ras Guanyl Nucleotide-Releasing Proteins**

Saïd El Kazzouli,<sup>1</sup> Nancy E. Lewin,<sup>2</sup> Peter M. Blumberg,<sup>2</sup> Victor E. Marquez<sup>1\*</sup>

Table of contents

|                                                      |        |
|------------------------------------------------------|--------|
| Table of Elemental Analysis .....                    | S2-S4  |
| <sup>1</sup> H and <sup>13</sup> C NMR Spectra ..... | S5-S38 |

**Table of Elemental Analysis**

| Compound Number                                                                                                                     | Formula                                                                            | Calculated |      |      | Found |      |      |
|-------------------------------------------------------------------------------------------------------------------------------------|------------------------------------------------------------------------------------|------------|------|------|-------|------|------|
|                                                                                                                                     |                                                                                    | C          | H    | N    | C     | H    | N    |
| 7-E (R <sub>2</sub> = 2-pyridyl)                                                                                                    | C <sub>26</sub> H <sub>25</sub> NO <sub>5</sub>                                    | 72.37      | 5.84 | 3.25 | 72.47 | 5.99 | 3.21 |
| 7-E (R <sub>2</sub> = 3-pyridyl)                                                                                                    | C <sub>26</sub> H <sub>25</sub> NO <sub>5</sub> •0.6H <sub>2</sub> O               | 70.60      | 5.97 | 3.17 | 70.21 | 5.94 | 2.96 |
| 7-Z (R <sub>2</sub> = 3-pyridyl)                                                                                                    | C <sub>26</sub> H <sub>25</sub> NO <sub>5</sub> •0.3H <sub>2</sub> O               | 71.48      | 5.91 | 3.21 | 71.45 | 5.80 | 3.23 |
| 7-E (R <sub>2</sub> = 4-pyridyl)                                                                                                    | C <sub>26</sub> H <sub>25</sub> NO <sub>5</sub> •0.3H <sub>2</sub> O               | 71.48      | 5.91 | 3.21 | 71.34 | 5.73 | 3.30 |
| 7-E (R <sub>2</sub> = 2-quinolyl)                                                                                                   | C <sub>30</sub> H <sub>27</sub> NO <sub>5</sub>                                    | 74.83      | 5.65 | 2.91 | 74.54 | 5.72 | 2.89 |
| 7-Z (R <sub>2</sub> = 2-quinolyl)                                                                                                   | C <sub>30</sub> H <sub>27</sub> NO <sub>5</sub>                                    | 74.83      | 5.65 | 2.91 | 74.76 | 5.60 | 2.89 |
| 7-Z (R <sub>2</sub> = 3-quinolyl)                                                                                                   | C <sub>30</sub> H <sub>27</sub> NO <sub>5</sub>                                    | 74.83      | 5.65 | 2.91 | 74.76 | 5.60 | 2.89 |
| 9-E (R <sub>2</sub> = 2-pyridyl)                                                                                                    | C <sub>19</sub> H <sub>19</sub> NO <sub>4</sub>                                    | 70.14      | 5.89 | 4.31 | 70.00 | 6.02 | 4.03 |
| 9-Z (R <sub>2</sub> = 2-pyridyl)                                                                                                    | C <sub>19</sub> H <sub>19</sub> NO <sub>4</sub>                                    | 70.14      | 5.89 | 4.31 | 70.00 | 5.83 | 4.25 |
| 9-E (R <sub>2</sub> = 3-pyridyl)                                                                                                    | C <sub>19</sub> H <sub>19</sub> NO <sub>4</sub>                                    | 70.14      | 5.89 | 4.31 | 69.99 | 5.93 | 4.28 |
| 9-Z (R <sub>2</sub> = 3-pyridyl)                                                                                                    | C <sub>19</sub> H <sub>19</sub> NO <sub>4</sub> •0.2H <sub>2</sub> O               | 69.37      | 5.94 | 4.26 | 69.35 | 5.94 | 4.23 |
| 9-E (R <sub>2</sub> = 4-pyridyl)                                                                                                    | C <sub>19</sub> H <sub>19</sub> NO <sub>4</sub> •0.3H <sub>2</sub> O               | 68.99      | 5.97 | 4.23 | 68.96 | 5.77 | 4.18 |
| 9-Z (R <sub>2</sub> = 4-pyridyl)                                                                                                    | C <sub>19</sub> H <sub>19</sub> NO <sub>4</sub> •0.2H <sub>2</sub> O               | 69.37      | 5.94 | 4.26 | 69.23 | 5.86 | 4.18 |
| 9-E (R <sub>2</sub> = 3-quinolyl)                                                                                                   | C <sub>23</sub> H <sub>21</sub> NO <sub>4</sub> •0.3H <sub>2</sub> O               | 72.54      | 5.72 | 3.68 | 72.58 | 5.64 | 3.73 |
| 9-Z (R <sub>2</sub> = 3-quinolyl)                                                                                                   | C <sub>23</sub> H <sub>21</sub> NO <sub>4</sub> •0.8H <sub>2</sub> O               | 70.86      | 5.84 | 3.59 | 70.78 | 5.60 | 3.65 |
| 11-E (R <sub>1</sub> = 4-(CH <sub>3</sub> ) <sub>2</sub> NC <sub>6</sub> H <sub>4</sub> <sup>-</sup> , R <sub>2</sub> = 2-pyridyl)  | C <sub>28</sub> H <sub>28</sub> N <sub>2</sub> O <sub>5</sub>                      | 71.17      | 5.97 | 5.93 | 71.22 | 5.96 | 5.89 |
| 11-E (R <sub>1</sub> = 4-(CH <sub>3</sub> ) <sub>2</sub> NC <sub>6</sub> H <sub>4</sub> <sup>-</sup> , R <sub>2</sub> = 3-pyridyl)  | C <sub>28</sub> H <sub>28</sub> N <sub>2</sub> O <sub>5</sub> •0.3H <sub>2</sub> O | 70.36      | 6.03 | 5.86 | 70.31 | 5.95 | 5.73 |
| 11-Z (R <sub>1</sub> = 4-(CH <sub>3</sub> ) <sub>2</sub> NC <sub>6</sub> H <sub>4</sub> <sup>-</sup> , R <sub>2</sub> = 3-pyridyl)  | C <sub>28</sub> H <sub>28</sub> N <sub>2</sub> O <sub>5</sub> •0.1H <sub>2</sub> O | 70.90      | 5.99 | 5.91 | 70.60 | 5.99 | 5.94 |
| 11-E (R <sub>1</sub> = 4-(CH <sub>3</sub> ) <sub>2</sub> NC <sub>6</sub> H <sub>4</sub> <sup>-</sup> , R <sub>2</sub> = 4-pyridyl)  | C <sub>28</sub> H <sub>28</sub> N <sub>2</sub> O <sub>5</sub> •0.5H <sub>2</sub> O | 69.84      | 6.07 | 5.82 | 69.63 | 5.84 | 5.71 |
| 11-Z (R <sub>1</sub> = 4-(CH <sub>3</sub> ) <sub>2</sub> NC <sub>6</sub> H <sub>4</sub> <sup>-</sup> , R <sub>2</sub> = 4-pyridyl)  | C <sub>28</sub> H <sub>28</sub> N <sub>2</sub> O <sub>5</sub>                      | 71.17      | 5.97 | 5.93 | 71.37 | 5.93 | 5.97 |
| 11-E (R <sub>1</sub> = 4-(CH <sub>3</sub> ) <sub>2</sub> NC <sub>6</sub> H <sub>4</sub> <sup>-</sup> , R <sub>2</sub> = 2-quinolyl) | C <sub>32</sub> H <sub>30</sub> N <sub>2</sub> O <sub>5</sub> •0.1H <sub>2</sub> O | 73.29      | 5.80 | 5.34 | 72.91 | 5.79 | 5.39 |
| 11-E (R <sub>1</sub> = 4-(CH <sub>3</sub> ) <sub>2</sub> NC <sub>6</sub> H <sub>4</sub> <sup>-</sup> , R <sub>2</sub> = 3-quinolyl) | C <sub>32</sub> H <sub>30</sub> N <sub>2</sub> O <sub>5</sub> •0.5H <sub>2</sub> O | 72.30      | 5.88 | 5.27 | 72.12 | 5.75 | 5.19 |
| 11-E (R <sub>1</sub> = 4-CH <sub>3</sub> OC <sub>6</sub> H <sub>4</sub> <sup>-</sup> , R <sub>2</sub> = 2-pyridyl)                  | C <sub>27</sub> H <sub>25</sub> NO <sub>6</sub>                                    | 70.58      | 5.48 | 3.05 | 70.45 | 5.50 | 2.91 |
| 11-Z (R <sub>1</sub> = 4-CH <sub>3</sub> OC <sub>6</sub> H <sub>4</sub> <sup>-</sup> , R <sub>2</sub> = 2-pyridyl)                  | C <sub>27</sub> H <sub>25</sub> NO <sub>6</sub> •0.5H <sub>2</sub> O               | 69.22      | 5.59 | 2.99 | 69.26 | 5.32 | 3.15 |
| 11-E (R <sub>1</sub> = 4-CH <sub>3</sub> OC <sub>6</sub> H <sub>4</sub> <sup>-</sup> , R <sub>2</sub> = 3-pyridyl)                  | C <sub>27</sub> H <sub>25</sub> NO <sub>6</sub>                                    | 70.58      | 5.48 | 3.05 | 70.52 | 5.45 | 2.96 |
| 11-Z (R <sub>1</sub> = 4-CH <sub>3</sub> OC <sub>6</sub> H <sub>4</sub> <sup>-</sup> , R <sub>2</sub> = 3-pyridyl)                  | C <sub>27</sub> H <sub>25</sub> NO <sub>6</sub> •0.5H <sub>2</sub> O               | 69.22      | 5.59 | 2.99 | 69.11 | 5.39 | 2.81 |
| 11-E (R <sub>1</sub> = 4-CH <sub>3</sub> OC <sub>6</sub> H <sub>4</sub> <sup>-</sup> , R <sub>2</sub> = 4-pyridyl)                  | C <sub>27</sub> H <sub>25</sub> NO <sub>6</sub>                                    | 70.58      | 5.48 | 3.05 | 70.60 | 5.65 | 3.10 |
| 11-Z (R <sub>1</sub> = 4-CH <sub>3</sub> OC <sub>6</sub> H <sub>4</sub> <sup>-</sup> , R <sub>2</sub> = 4-pyridyl)                  | C <sub>27</sub> H <sub>25</sub> NO <sub>6</sub>                                    | 70.58      | 5.48 | 3.05 | 70.15 | 5.40 | 2.99 |

| Compound Number                                                                                                                          | Formula                                                                            | Calculated |      |      | Found |      |      |
|------------------------------------------------------------------------------------------------------------------------------------------|------------------------------------------------------------------------------------|------------|------|------|-------|------|------|
|                                                                                                                                          |                                                                                    | C          | H    | N    | C     | H    | N    |
| 11-E (R <sub>1</sub> = 4-CH <sub>3</sub> OC <sub>6</sub> H <sub>4</sub> <sup>-</sup> , R <sub>2</sub> = 2-quinolyl)                      | C <sub>31</sub> H <sub>27</sub> NO <sub>6</sub> •0.1H <sub>2</sub> O               | 72.81      | 5.36 | 2.74 | 72.48 | 5.34 | 2.70 |
| 11-Z (R <sub>1</sub> = 4-CH <sub>3</sub> OC <sub>6</sub> H <sub>4</sub> <sup>-</sup> , R <sub>2</sub> = 2-quinolyl)                      | C <sub>31</sub> H <sub>27</sub> NO <sub>6</sub> •0.2H <sub>2</sub> O               | 72.56      | 5.38 | 2.73 | 72.27 | 5.32 | 2.78 |
| 11-E (R <sub>1</sub> = 4-CH <sub>3</sub> OC <sub>6</sub> H <sub>4</sub> <sup>-</sup> , R <sub>2</sub> = 3-quinolyl)                      | C <sub>31</sub> H <sub>27</sub> NO <sub>6</sub> •0.5H <sub>2</sub> O               | 71.80      | 5.44 | 2.70 | 71.92 | 5.38 | 2.76 |
| 11-E (R <sub>1</sub> = CH(CH <sub>2</sub> CH <sub>2</sub> CH <sub>3</sub> ) <sub>2</sub> , R <sub>2</sub> = 2-pyridyl)                   | C <sub>27</sub> H <sub>33</sub> NO <sub>5</sub>                                    | 71.82      | 7.37 | 3.10 | 71.87 | 7.44 | 3.06 |
| 11-Z (R <sub>1</sub> = CH(CH <sub>2</sub> CH <sub>2</sub> CH <sub>3</sub> ) <sub>2</sub> , R <sub>2</sub> = 2-pyridyl)                   | C <sub>27</sub> H <sub>33</sub> NO <sub>5</sub> •0.6H <sub>2</sub> O               | 70.14      | 7.46 | 3.03 | 69.97 | 7.22 | 3.03 |
| 11-E (R <sub>1</sub> = CH(CH <sub>2</sub> CH <sub>2</sub> CH <sub>3</sub> ) <sub>2</sub> , R <sub>2</sub> = 3-pyridyl)                   | C <sub>27</sub> H <sub>33</sub> NO <sub>5</sub>                                    | 71.82      | 7.37 | 3.10 | 71.71 | 7.57 | 3.30 |
| 11-Z (R <sub>1</sub> = CH(CH <sub>2</sub> CH <sub>2</sub> CH <sub>3</sub> ) <sub>2</sub> , R <sub>2</sub> = 3-pyridyl)                   | C <sub>27</sub> H <sub>33</sub> NO <sub>5</sub>                                    | 71.82      | 7.37 | 3.10 | 71.84 | 7.50 | 3.04 |
| 11-E (R <sub>1</sub> = CH(CH <sub>2</sub> CH <sub>2</sub> CH <sub>3</sub> ) <sub>2</sub> , R <sub>2</sub> = 4-pyridyl)                   | C <sub>27</sub> H <sub>33</sub> NO <sub>5</sub> •H <sub>2</sub> O                  | 69.06      | 7.51 | 2.98 | 68.67 | 7.09 | 3.05 |
| 11-Z (R <sub>1</sub> = CH(CH <sub>2</sub> CH <sub>2</sub> CH <sub>3</sub> ) <sub>2</sub> , R <sub>2</sub> = 4-pyridyl)                   | C <sub>27</sub> H <sub>33</sub> NO <sub>5</sub> •0.6H <sub>2</sub> O               | 70.14      | 7.46 | 3.03 | 70.03 | 7.39 | 2.80 |
| 11-E (R <sub>1</sub> = CH(CH <sub>2</sub> CH <sub>2</sub> CH <sub>3</sub> ) <sub>2</sub> , R <sub>2</sub> = 2-quinolyl)                  | C <sub>31</sub> H <sub>35</sub> NO <sub>5</sub> •0.5H <sub>2</sub> O               | 72.92      | 7.11 | 2.74 | 72.63 | 6.97 | 2.72 |
| 11-Z (R <sub>1</sub> = CH(CH <sub>2</sub> CH <sub>2</sub> CH <sub>3</sub> ) <sub>2</sub> , R <sub>2</sub> = 2-quinolyl)                  | C <sub>31</sub> H <sub>35</sub> NO <sub>5</sub> •0.2H <sub>2</sub> O               | 73.70      | 7.06 | 2.77 | 73.46 | 7.01 | 2.68 |
| 11-Z (R <sub>1</sub> = CH(CH <sub>2</sub> CH <sub>2</sub> CH <sub>3</sub> ) <sub>2</sub> , R <sub>2</sub> = 3-quinolyl)                  | C <sub>31</sub> H <sub>35</sub> NO <sub>5</sub> •0.2H <sub>2</sub> O               | 73.70      | 7.06 | 2.77 | 73.48 | 7.07 | 2.78 |
| 11-E (R <sup>1</sup> = CH <sub>2</sub> CH[CH <sub>2</sub> CH(CH <sub>3</sub> ) <sub>2</sub> ] <sub>2</sub> , R <sup>2</sup> = 2-pyridyl) | C <sub>30</sub> H <sub>39</sub> NO <sub>5</sub>                                    | 72.99      | 7.96 | 2.84 | 73.04 | 8.07 | 2.90 |
| 12b-E                                                                                                                                    | C <sub>21</sub> H <sub>22</sub> N <sub>2</sub> O <sub>5</sub> •0.1H <sub>2</sub> O | 65.96      | 5.80 | 7.33 | 65.96 | 5.85 | 7.26 |
| 12c-E                                                                                                                                    | C <sub>21</sub> H <sub>22</sub> N <sub>2</sub> O <sub>5</sub> •0.9H <sub>2</sub> O | 63.27      | 6.02 | 7.03 | 63.01 | 5.62 | 6.89 |
| 12c-Z                                                                                                                                    | C <sub>21</sub> H <sub>22</sub> N <sub>2</sub> O <sub>5</sub> •0.4H <sub>2</sub> O | 64.74      | 5.90 | 7.19 | 64.88 | 5.94 | 7.19 |
| 12d-E                                                                                                                                    | C <sub>25</sub> H <sub>24</sub> N <sub>2</sub> O <sub>5</sub> •0.1H <sub>2</sub> O | 69.14      | 5.62 | 6.45 | 69.00 | 5.63 | 6.33 |
| 12d-Z                                                                                                                                    | C <sub>25</sub> H <sub>24</sub> N <sub>2</sub> O <sub>5</sub> •0.1H <sub>2</sub> O | 69.14      | 5.62 | 6.45 | 68.99 | 5.60 | 6.33 |
| 12d-E                                                                                                                                    | C <sub>25</sub> H <sub>24</sub> N <sub>2</sub> O <sub>5</sub> •0.8H <sub>2</sub> O | 67.19      | 5.77 | 6.27 | 66.99 | 5.43 | 6.15 |
| 12e-Z                                                                                                                                    | C <sub>25</sub> H <sub>24</sub> N <sub>2</sub> O <sub>5</sub> •0.6H <sub>2</sub> O | 67.74      | 5.73 | 6.32 | 67.79 | 5.48 | 6.31 |
| 12f-E                                                                                                                                    | C <sub>25</sub> H <sub>26</sub> N <sub>2</sub> O <sub>5</sub> •0.9H <sub>2</sub> O | 66.62      | 6.22 | 6.22 | 66.38 | 5.98 | 6.40 |
| 12g-E                                                                                                                                    | C <sub>20</sub> H <sub>19</sub> NO <sub>6</sub> •0.1H <sub>2</sub> O               | 64.72      | 5.21 | 3.77 | 64.55 | 5.43 | 3.61 |
| 12g-Z                                                                                                                                    | C <sub>20</sub> H <sub>19</sub> NO <sub>6</sub> •0.1H <sub>2</sub> O               | 64.72      | 5.21 | 3.77 | 64.55 | 5.34 | 3.61 |
| 12h-E                                                                                                                                    | C <sub>20</sub> H <sub>19</sub> NO <sub>6</sub> •0.1H <sub>2</sub> O               | 64.72      | 5.21 | 3.77 | 64.59 | 5.11 | 3.76 |
| 12h-Z                                                                                                                                    | C <sub>20</sub> H <sub>19</sub> NO <sub>6</sub>                                    | 65.03      | 5.18 | 3.79 | 64.92 | 5.23 | 3.75 |
| 12i-E                                                                                                                                    | C <sub>20</sub> H <sub>19</sub> NO <sub>6</sub> •0.4H <sub>2</sub> O               | 63.79      | 5.30 | 3.72 | 63.59 | 5.02 | 3.71 |
| 12i-Z                                                                                                                                    | C <sub>20</sub> H <sub>19</sub> NO <sub>6</sub>                                    | 65.03      | 5.18 | 3.79 | 64.77 | 5.22 | 3.70 |
| 12j-E                                                                                                                                    | C <sub>24</sub> H <sub>21</sub> NO <sub>6</sub> •H <sub>2</sub> O                  | 65.90      | 5.30 | 3.20 | 65.86 | 5.00 | 3.19 |
| 12j-Z                                                                                                                                    | C <sub>24</sub> H <sub>21</sub> NO <sub>6</sub> •0.5H <sub>2</sub> O               | 67.28      | 5.18 | 3.27 | 67.12 | 4.99 | 3.26 |
|                                                                                                                                          |                                                                                    |            |      |      |       |      |      |

| Compound Number | Formula                                                              | Calculated |      |      | Found |      |      |
|-----------------|----------------------------------------------------------------------|------------|------|------|-------|------|------|
|                 |                                                                      | C          | H    | N    | C     | H    | N    |
| 12k-E           | C <sub>24</sub> H <sub>21</sub> NO <sub>6</sub>                      | 68.73      | 5.05 | 3.34 | 68.33 | 5.07 | 3.42 |
| 12k-Z           | C <sub>24</sub> H <sub>21</sub> NO <sub>6</sub>                      | 68.73      | 5.05 | 3.34 | 68.48 | 5.09 | 3.34 |
| 12l-E           | C <sub>24</sub> H <sub>23</sub> NO <sub>6</sub>                      | 68.40      | 5.50 | 3.32 | 68.32 | 5.59 | 3.34 |
| 12m-E           | C <sub>20</sub> H <sub>27</sub> NO <sub>5</sub> •0.2H <sub>2</sub> O | 65.81      | 7.57 | 3.84 | 65.79 | 7.58 | 3.74 |
| 12m-Z           | C <sub>20</sub> H <sub>27</sub> NO <sub>5</sub> •0.5H <sub>2</sub> O | 64.85      | 7.62 | 3.78 | 64.86 | 7.53 | 3.83 |
| 12n-E           | C <sub>20</sub> H <sub>27</sub> NO <sub>5</sub>                      | 66.46      | 7.53 | 3.88 | 66.33 | 7.59 | 3.93 |
| 12n-Z           | C <sub>20</sub> H <sub>27</sub> NO <sub>5</sub>                      | 66.46      | 7.53 | 3.88 | 66.20 | 7.59 | 3.66 |
| 12o-E           | C <sub>20</sub> H <sub>27</sub> NO <sub>5</sub> •0.7H <sub>2</sub> O | 64.11      | 7.30 | 3.70 | 64.00 | 7.33 | 3.81 |
| 12o-Z           | C <sub>20</sub> H <sub>27</sub> NO <sub>5</sub> •0.2H <sub>2</sub> O | 65.81      | 7.57 | 3.83 | 65.51 | 7.49 | 3.77 |
| 12p-E           | C <sub>24</sub> H <sub>29</sub> NO <sub>5</sub> •0.2H <sub>2</sub> O | 69.44      | 7.14 | 3.37 | 69.21 | 7.23 | 3.37 |
| 12p-Z           | C <sub>24</sub> H <sub>29</sub> NO <sub>5</sub> •0.4H <sub>2</sub> O | 68.85      | 7.17 | 3.35 | 68.88 | 7.06 | 3.33 |
| 12q-E           | C <sub>24</sub> H <sub>29</sub> NO <sub>5</sub> •0.8H <sub>2</sub> O | 67.68      | 7.24 | 3.29 | 67.84 | 6.98 | 3.21 |
| 12q-Z           | C <sub>24</sub> H <sub>29</sub> NO <sub>5</sub> •0.3H <sub>2</sub> O | 69.14      | 7.16 | 3.36 | 69.01 | 6.89 | 3.29 |
| 12r-E           | C <sub>24</sub> H <sub>31</sub> NO <sub>5</sub> •0.6H <sub>2</sub> O | 67.93      | 7.65 | 3.30 | 67.74 | 7.54 | 3.11 |
| 12s-E           | C <sub>23</sub> H <sub>33</sub> NO <sub>5</sub>                      | 68.46      | 8.24 | 3.47 | 68.40 | 8.54 | 3.31 |
| 12t-E           | C <sub>27</sub> H <sub>37</sub> NO <sub>5</sub> •0.1H <sub>2</sub> O | 70.90      | 8.20 | 3.06 | 70.71 | 8.18 | 3.04 |

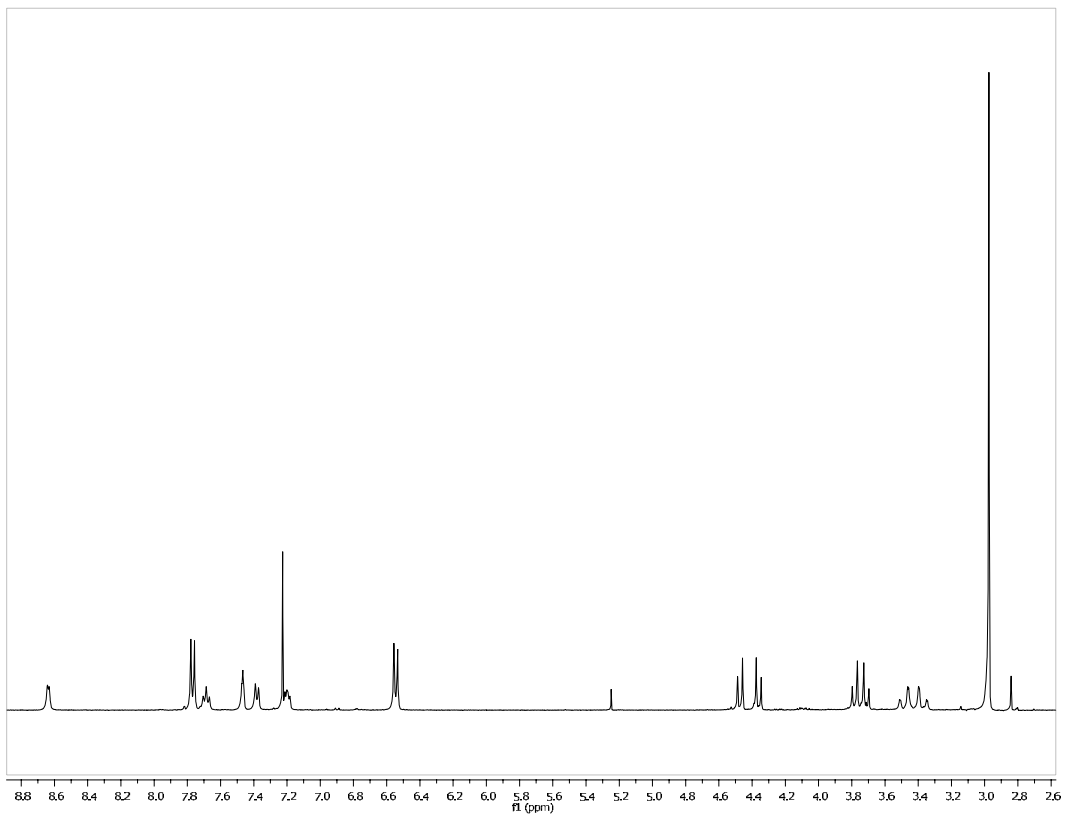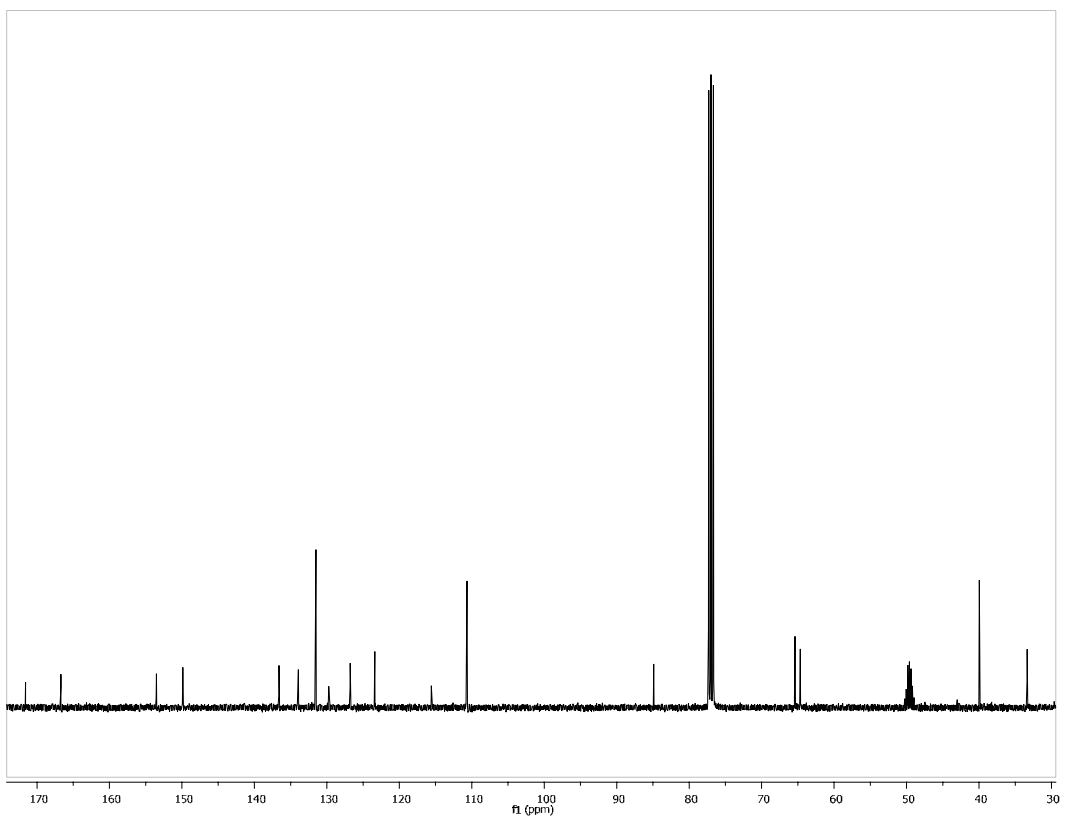

$^1\text{H}$  and  $^{13}\text{C}$  spectra of **12a-E**

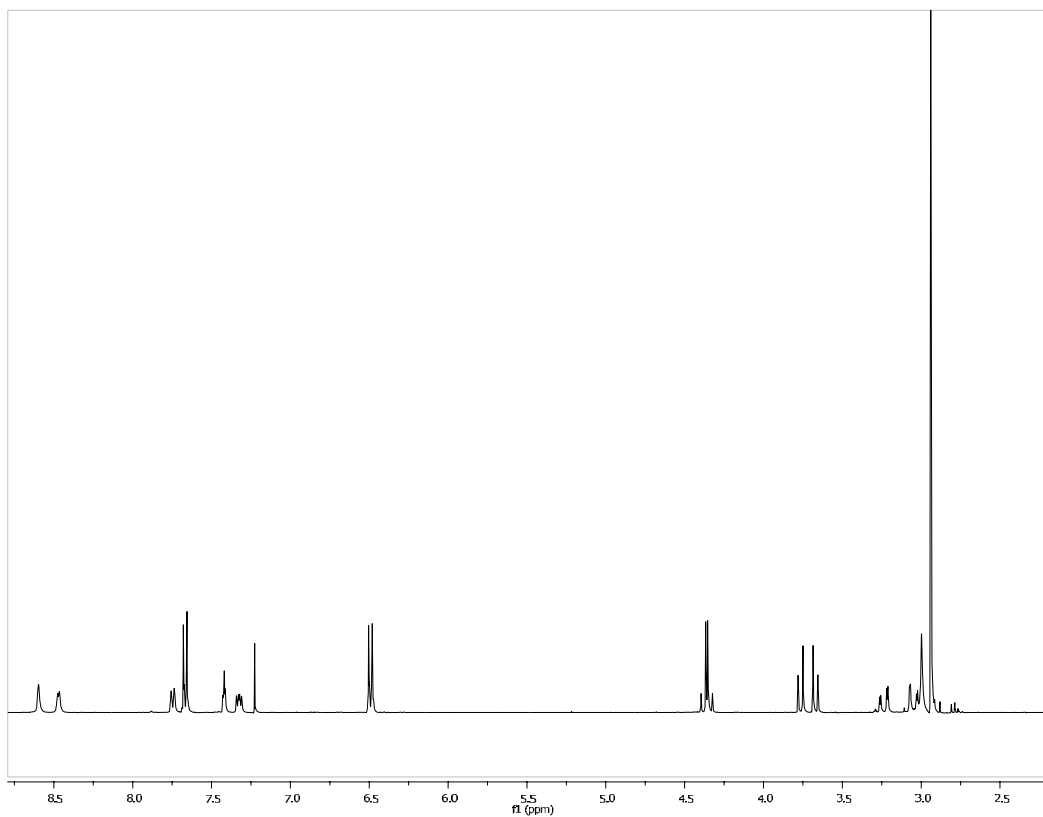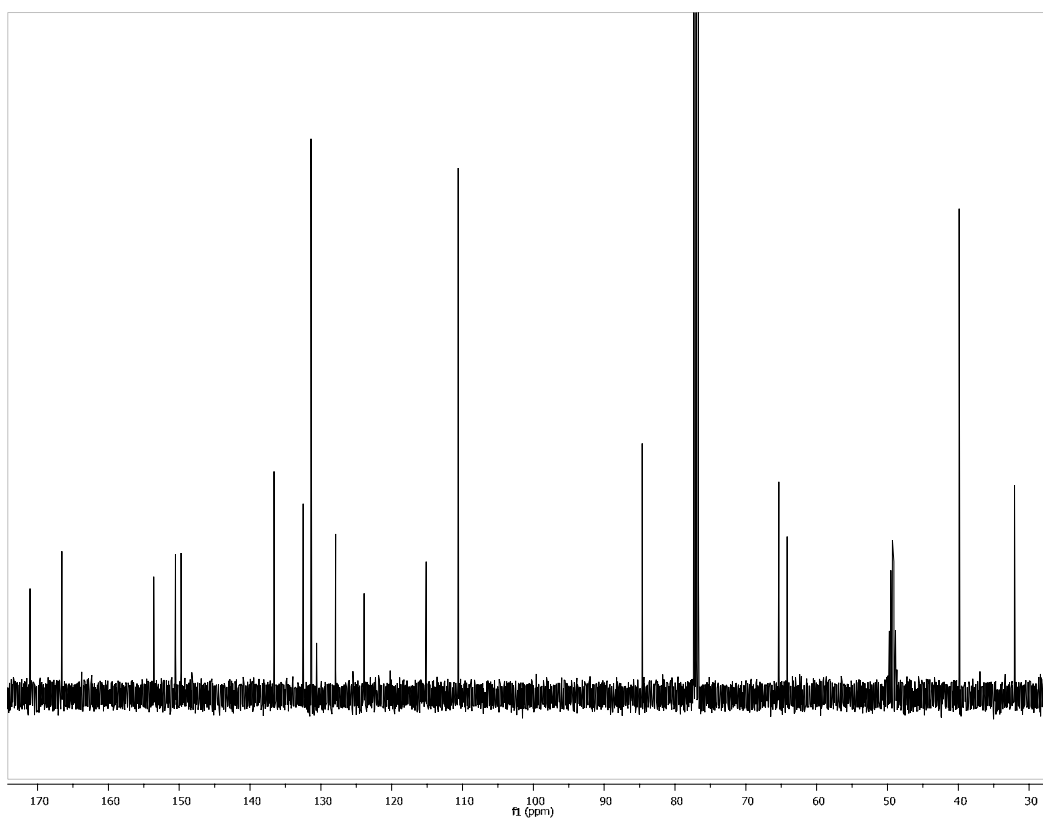

$^1\text{H}$  and  $^{13}\text{C}$  spectra of **12b-E**

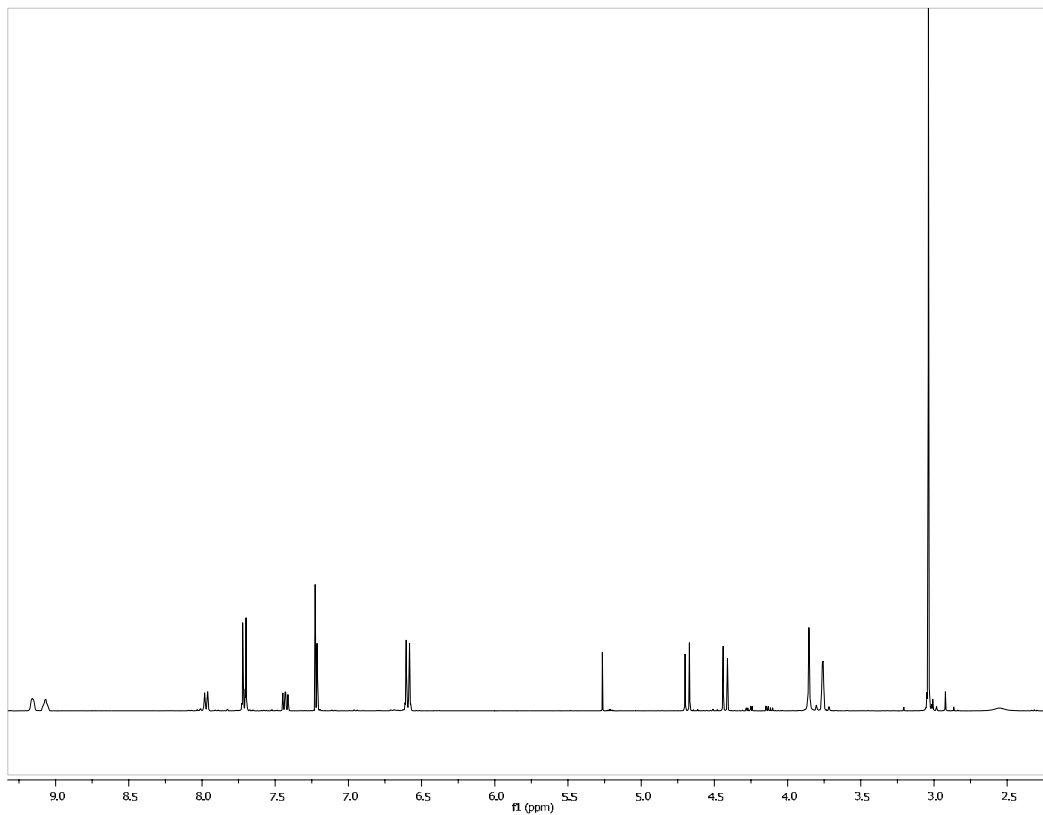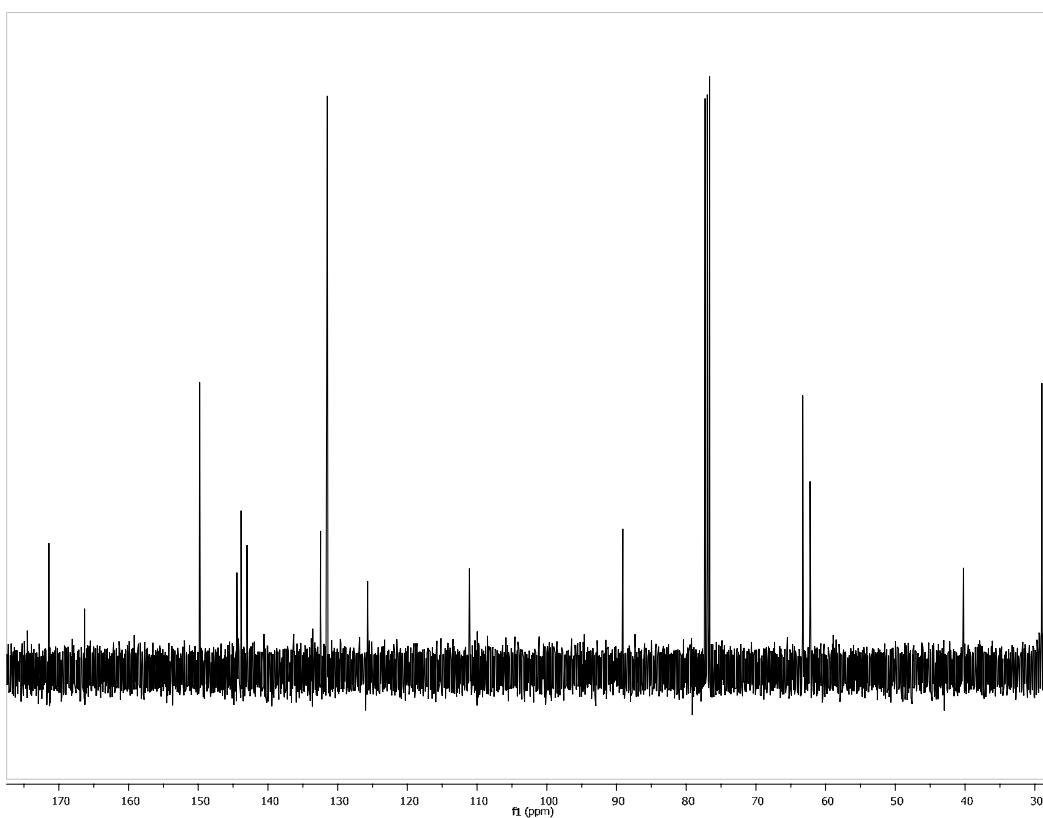

$^1\text{H}$  and  $^{13}\text{C}$  spectra of **12b-Z**

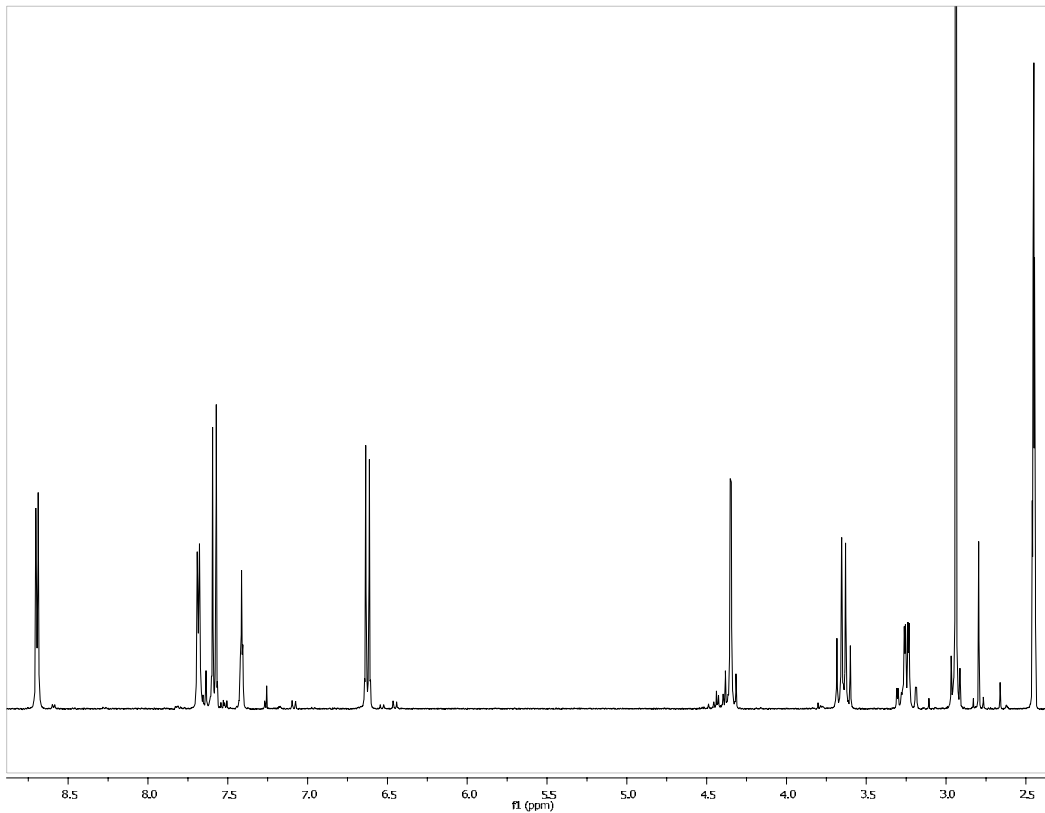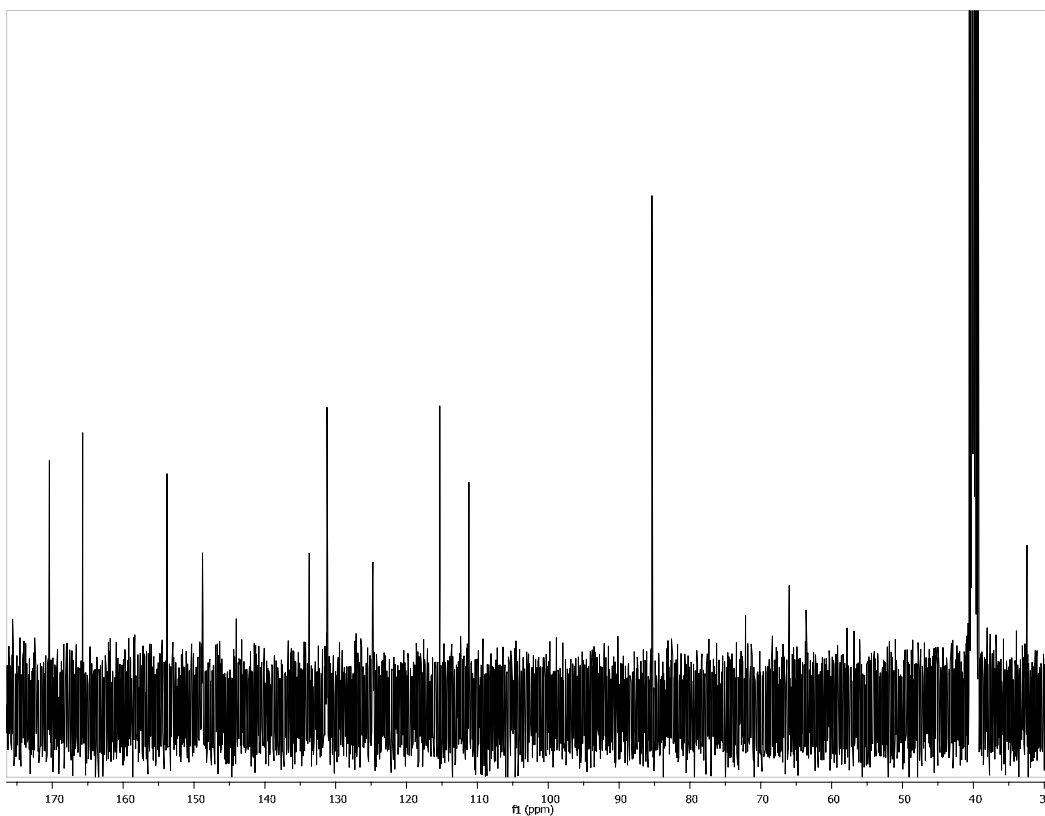

$^1\text{H}$  and  $^{13}\text{C}$  spectra of **12c-E**



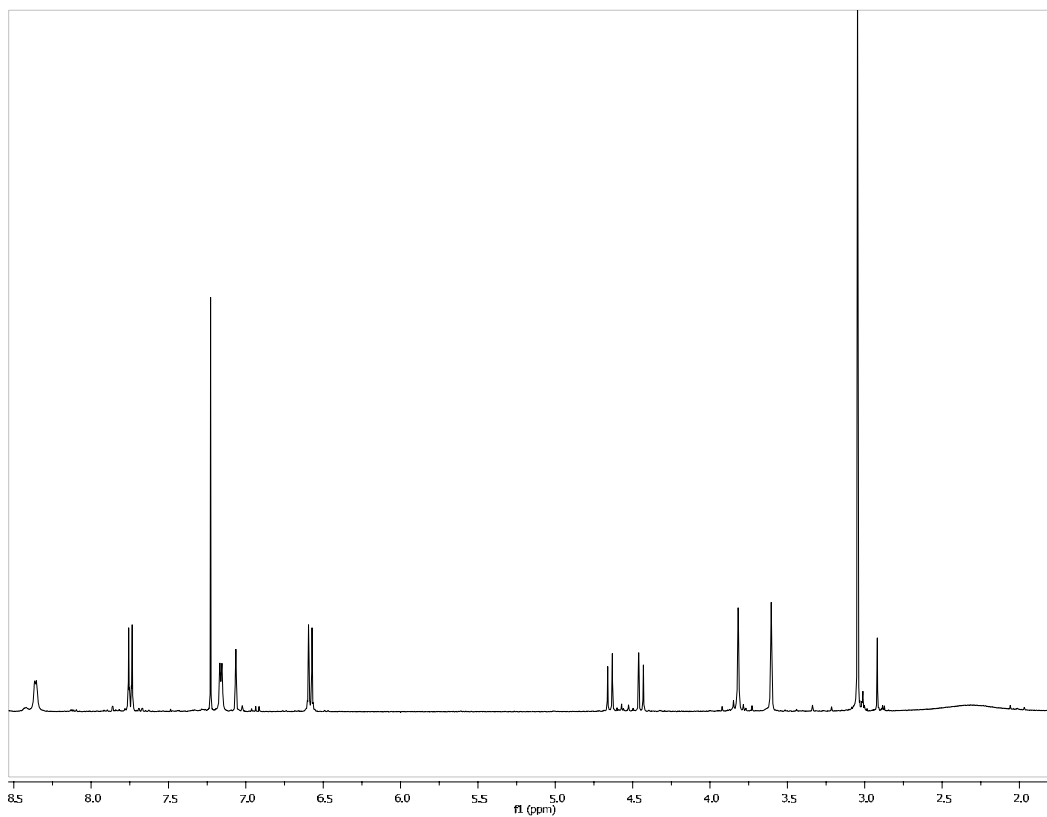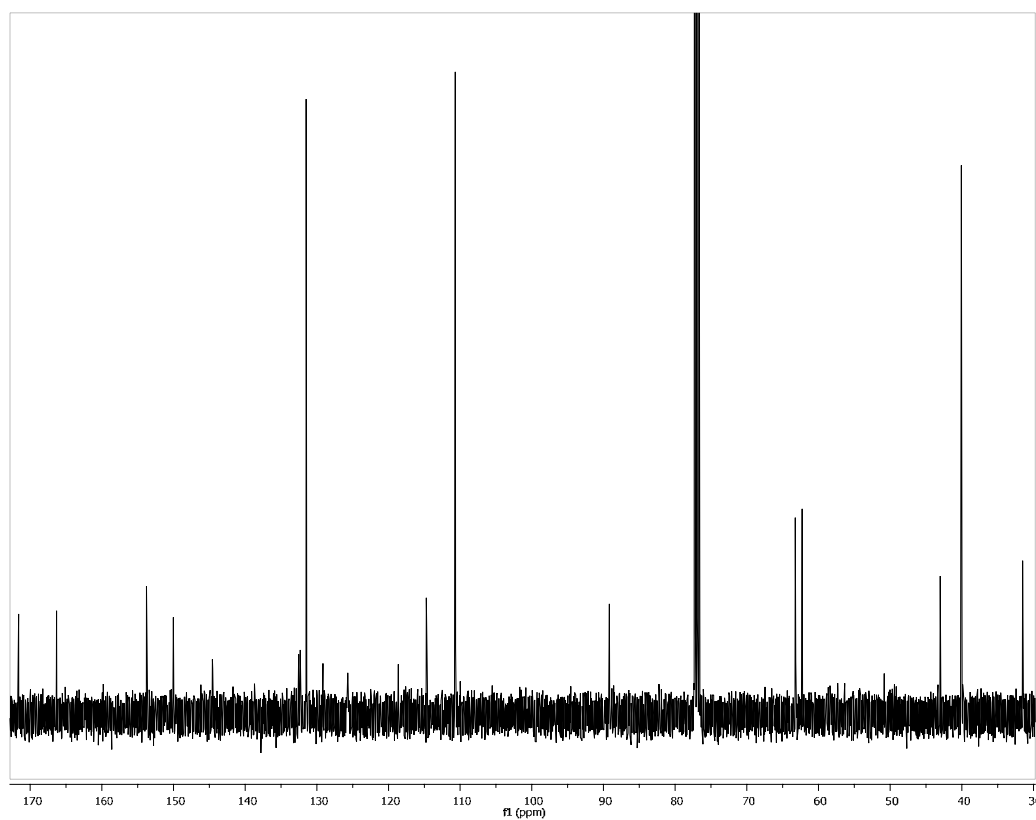

$^1\text{H}$  and  $^{13}\text{C}$  spectra of **12c-Z**

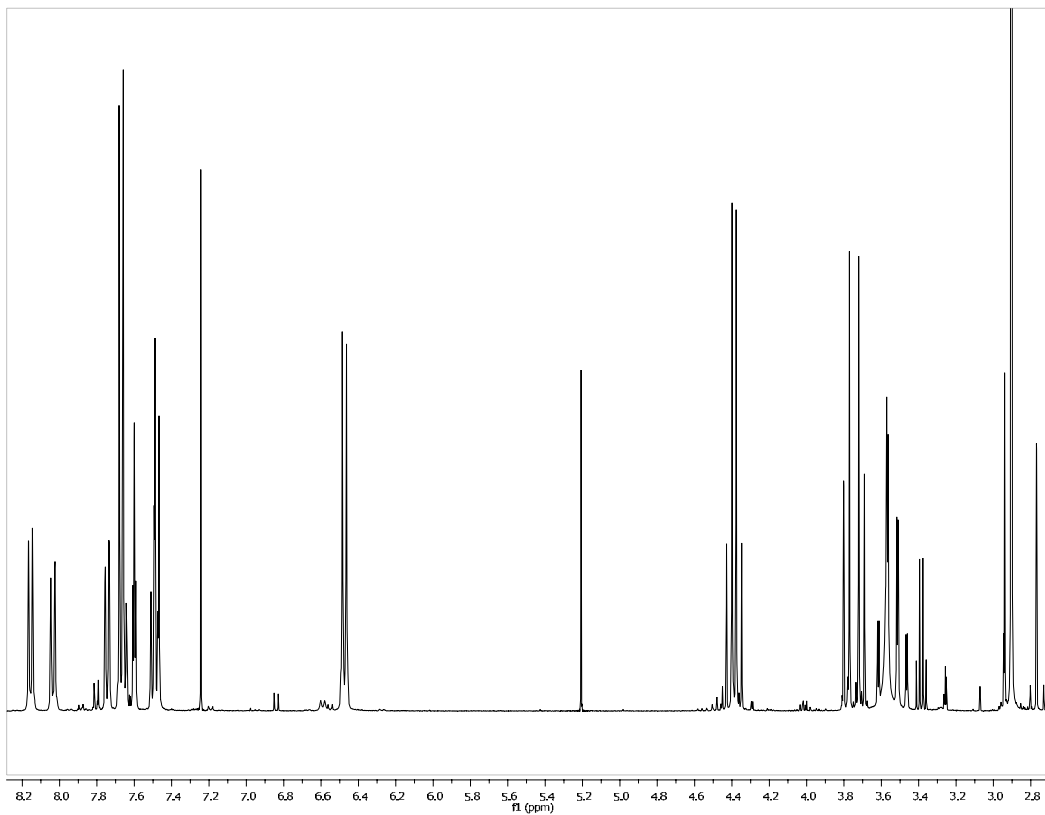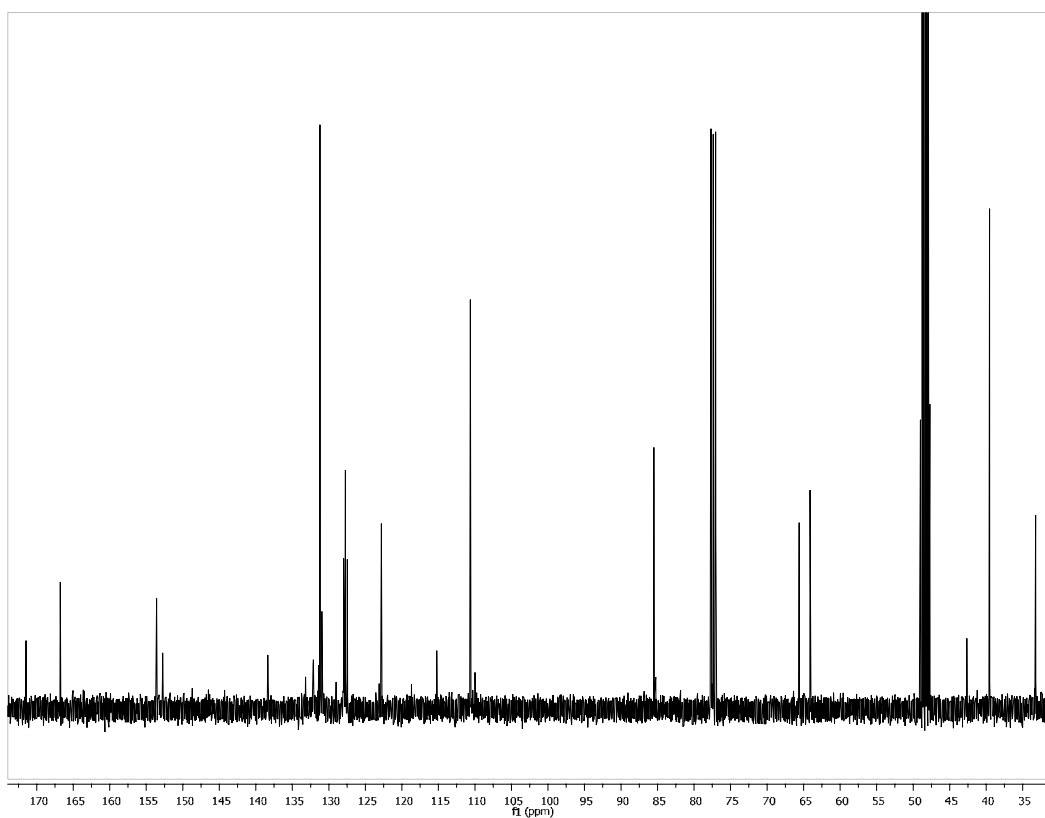

$^1\text{H}$  and  $^{13}\text{C}$  spectra of **12d-E**

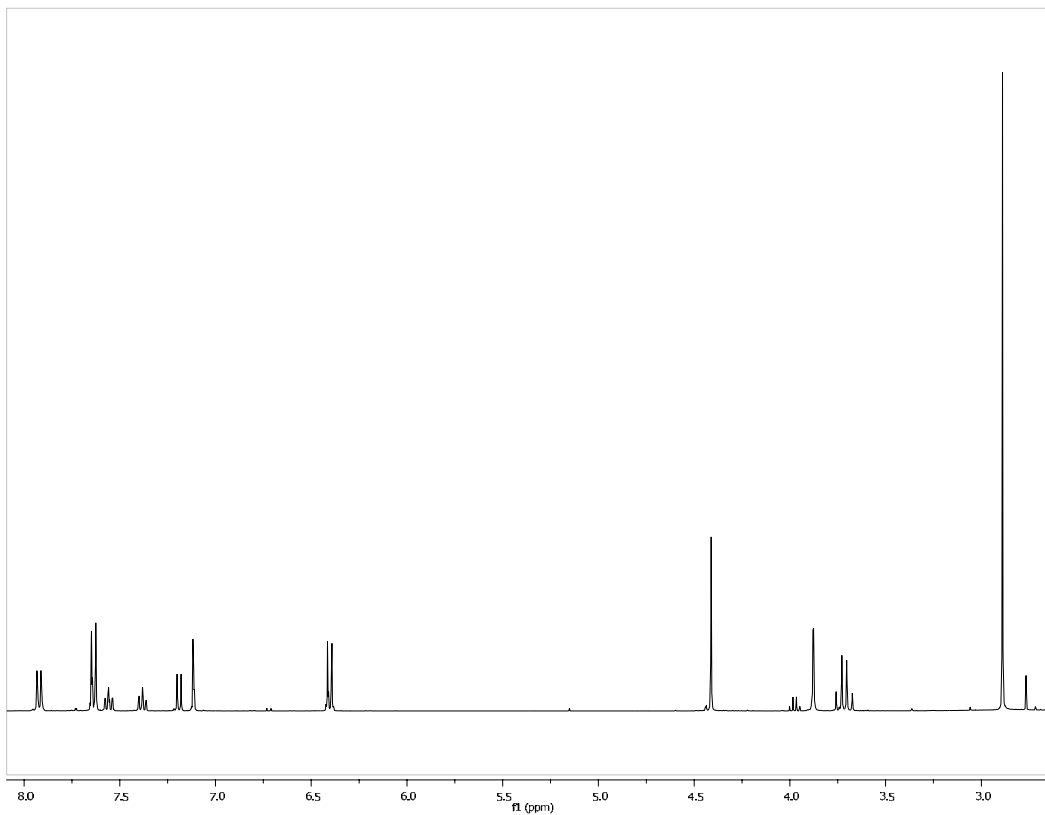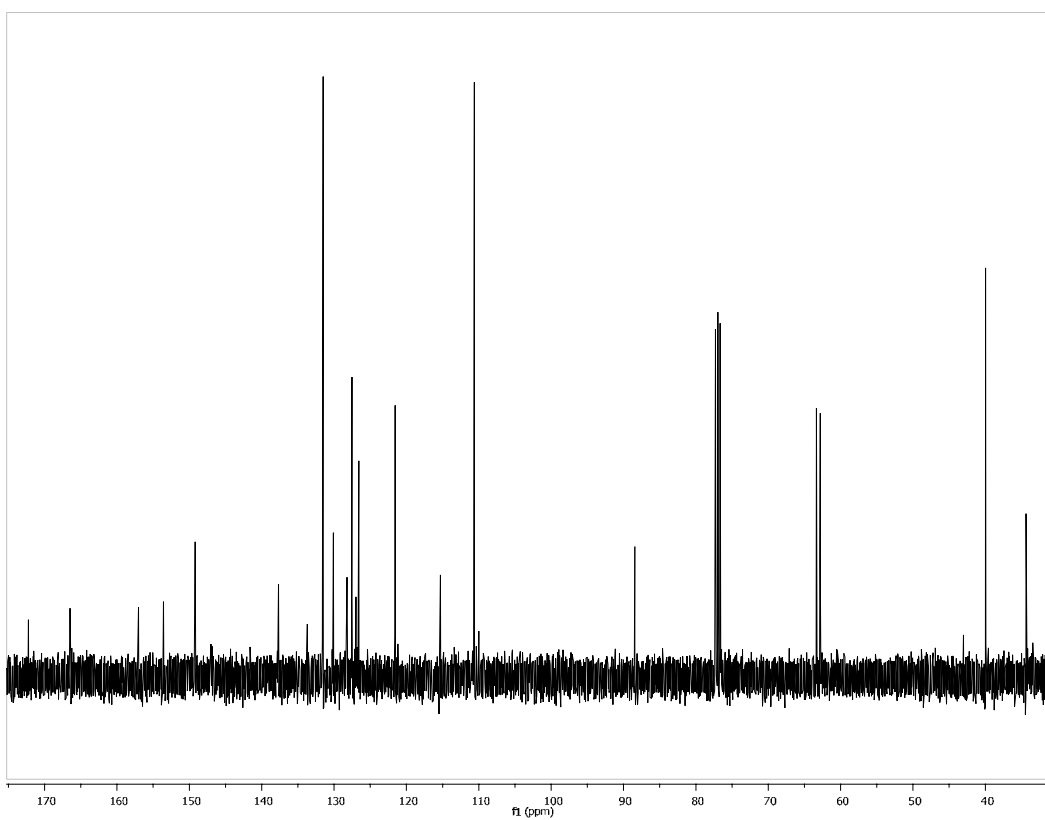

$^1\text{H}$  and  $^{13}\text{C}$  spectra of 12d-Z

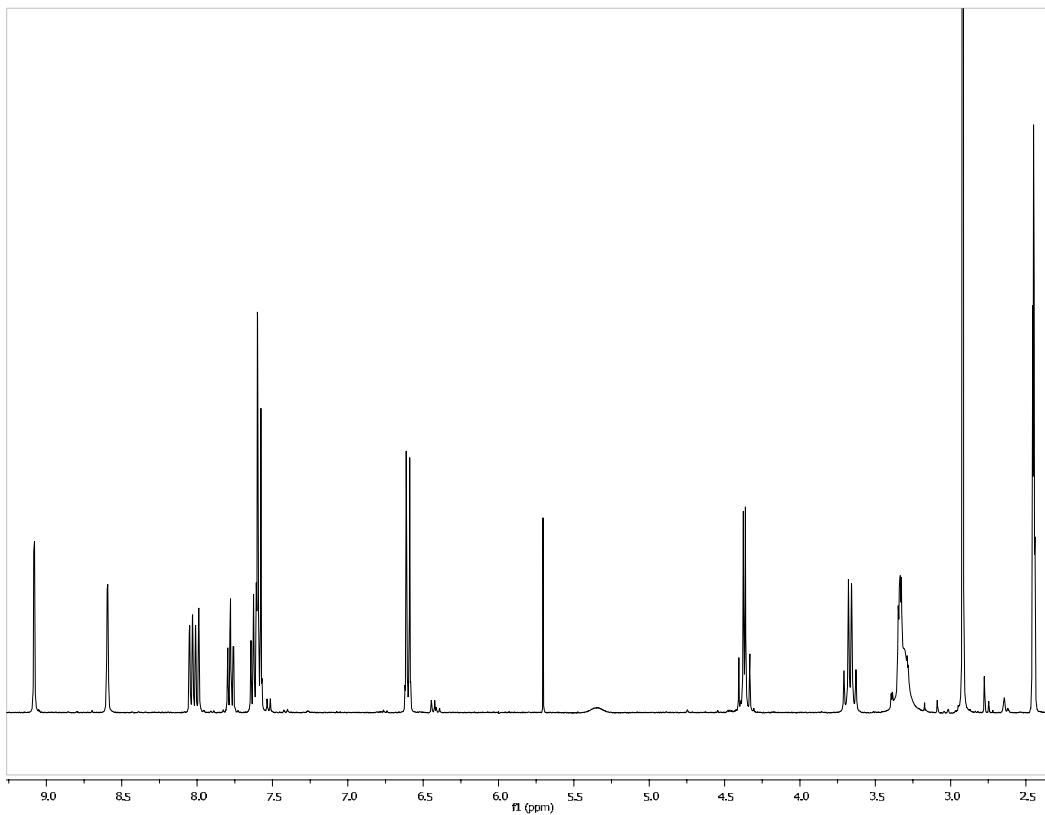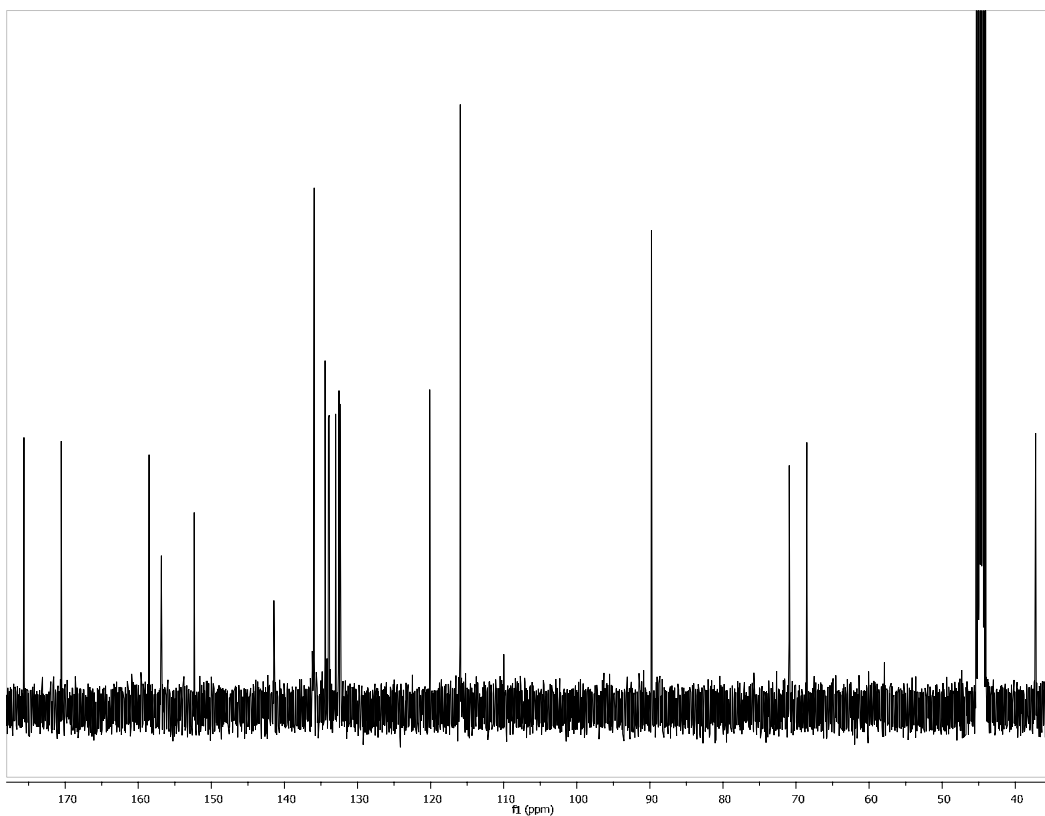

$^1\text{H}$  and  $^{13}\text{C}$  spectra of **12e-E**

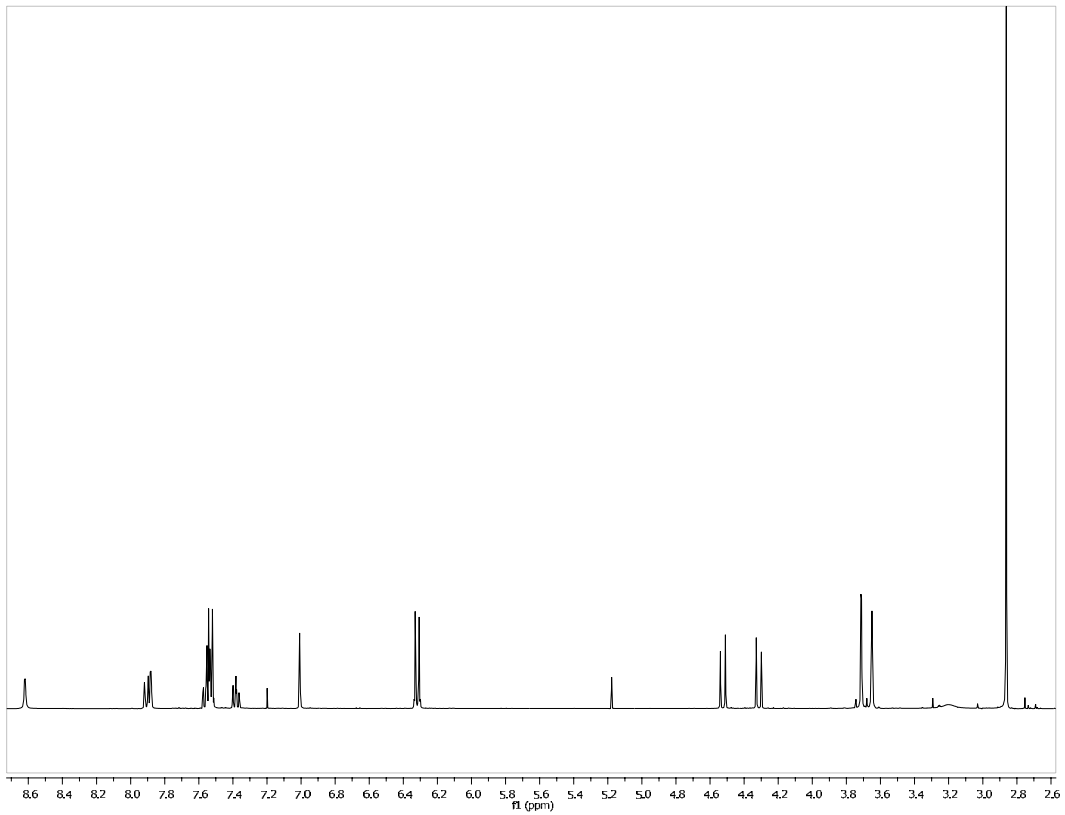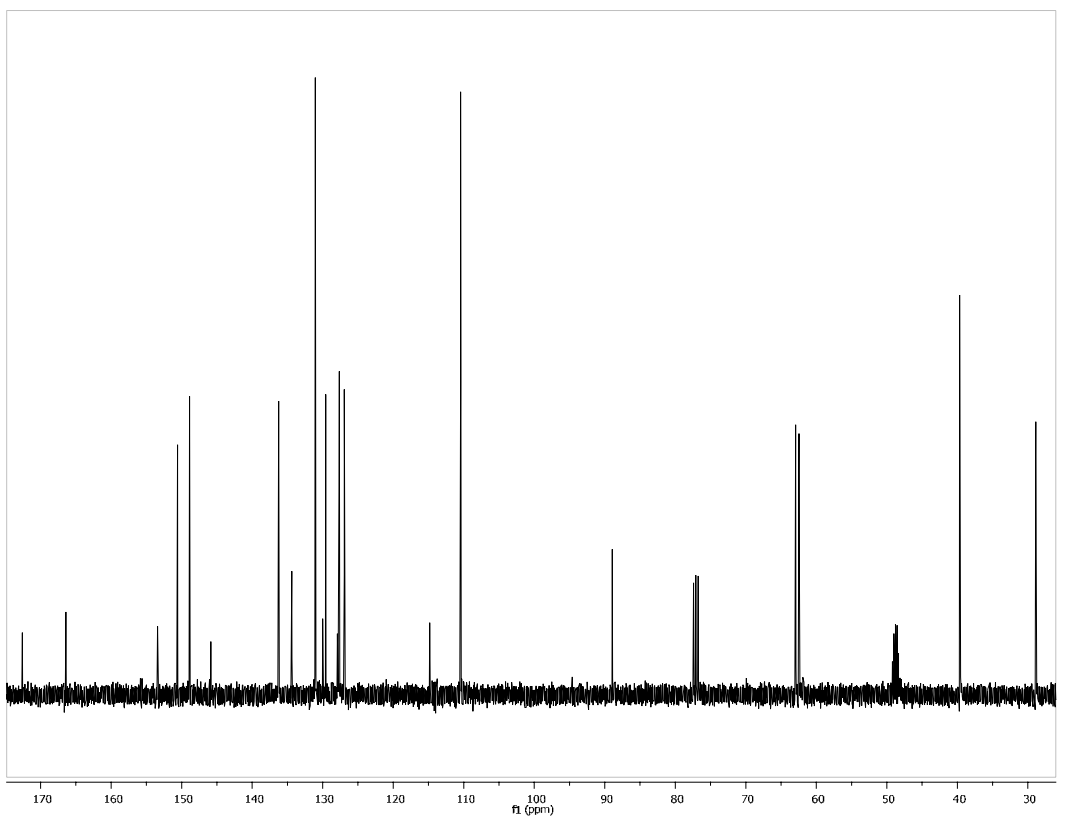

$^1\text{H}$  and  $^{13}\text{C}$  spectra of **12e-Z**

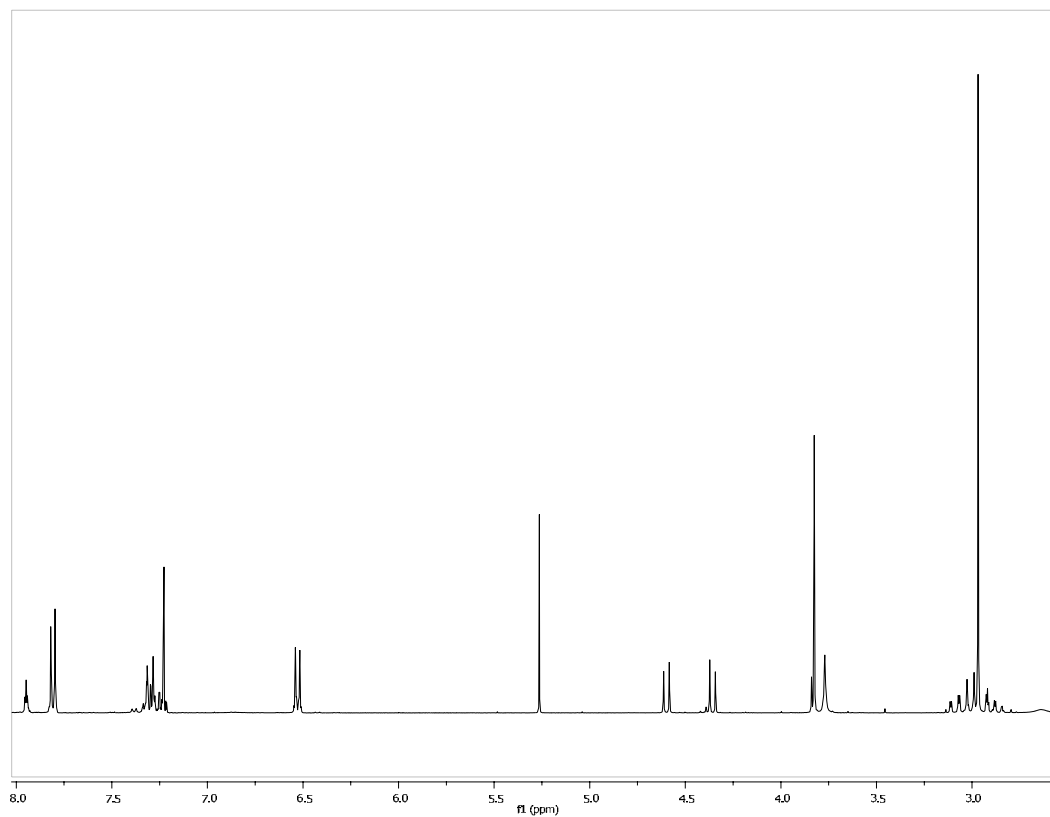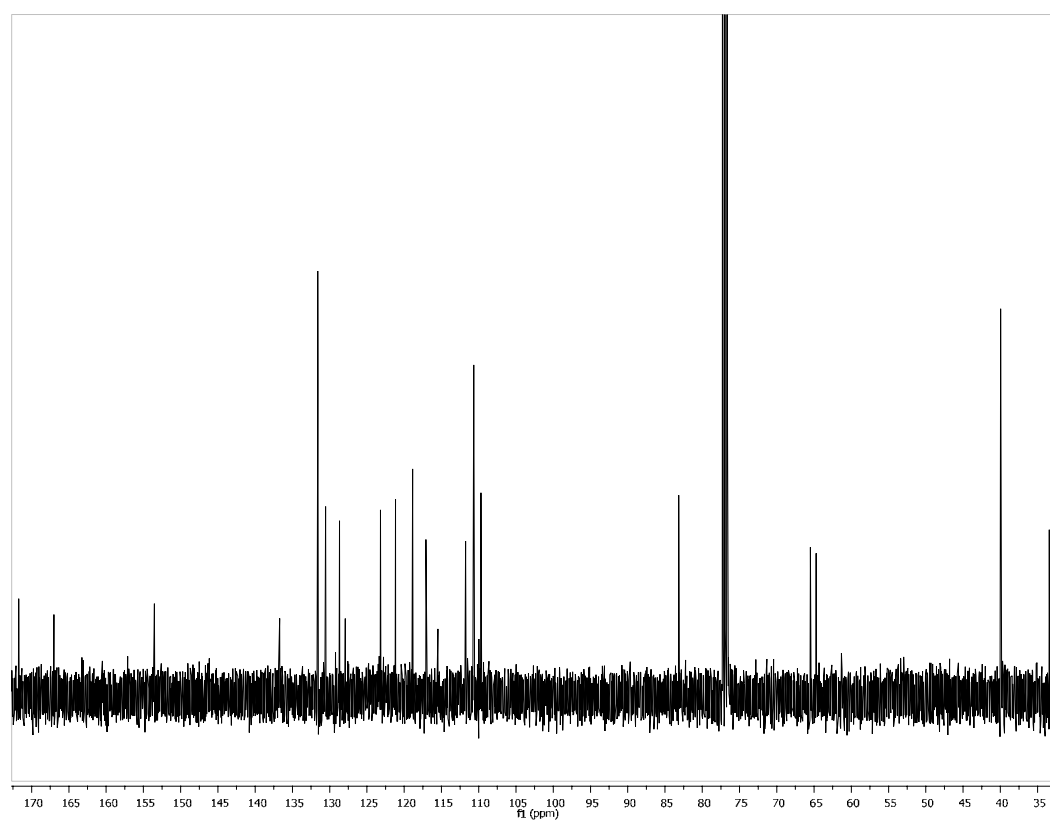

$^1\text{H}$  and  $^{13}\text{C}$  spectra of **12f-E**

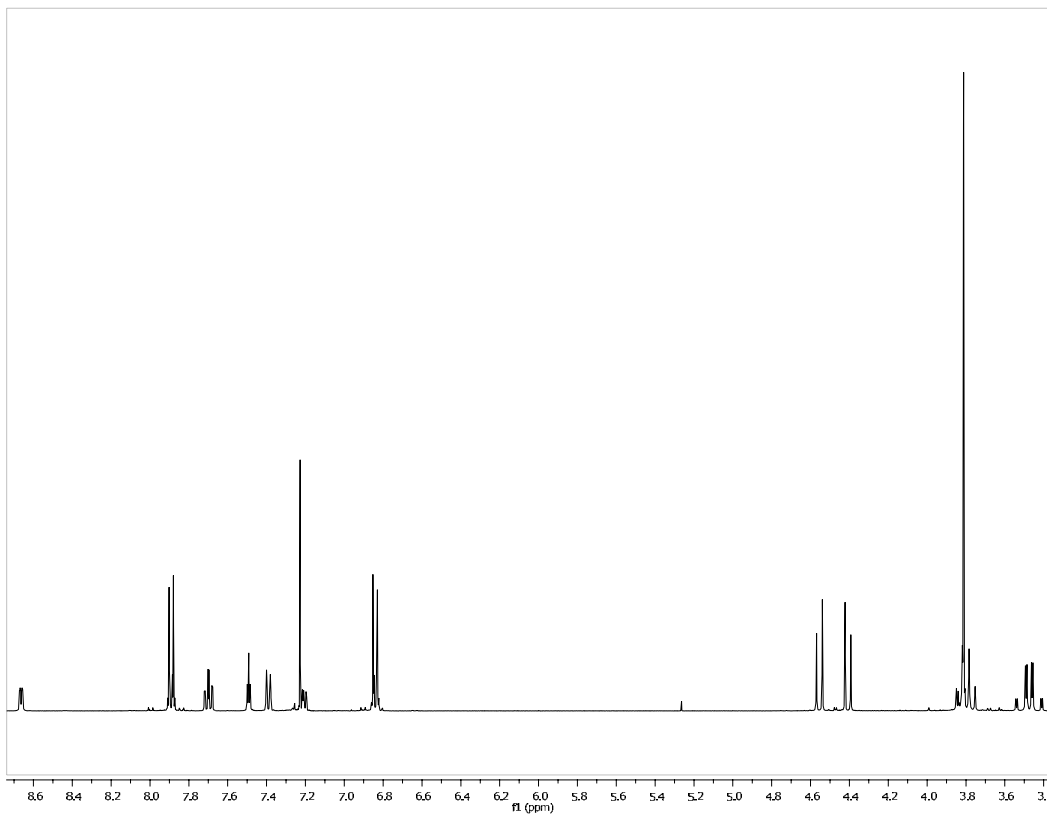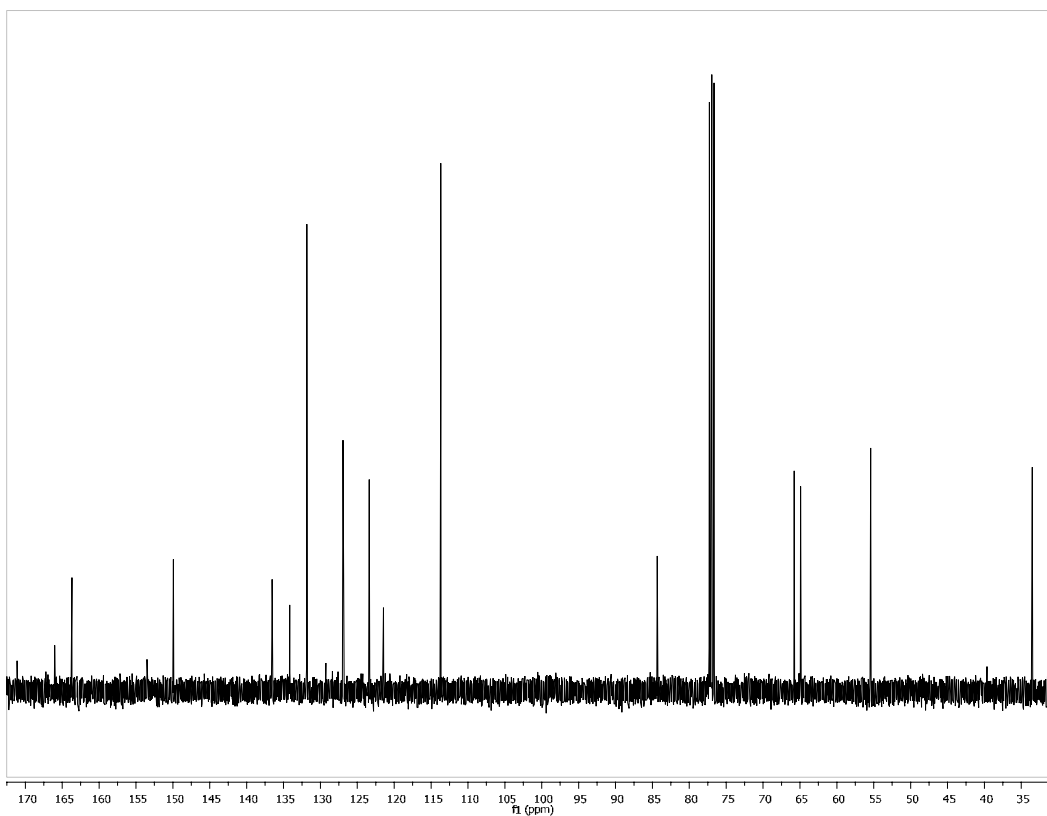

$^1\text{H}$  and  $^{13}\text{C}$  spectra of **12g-E**

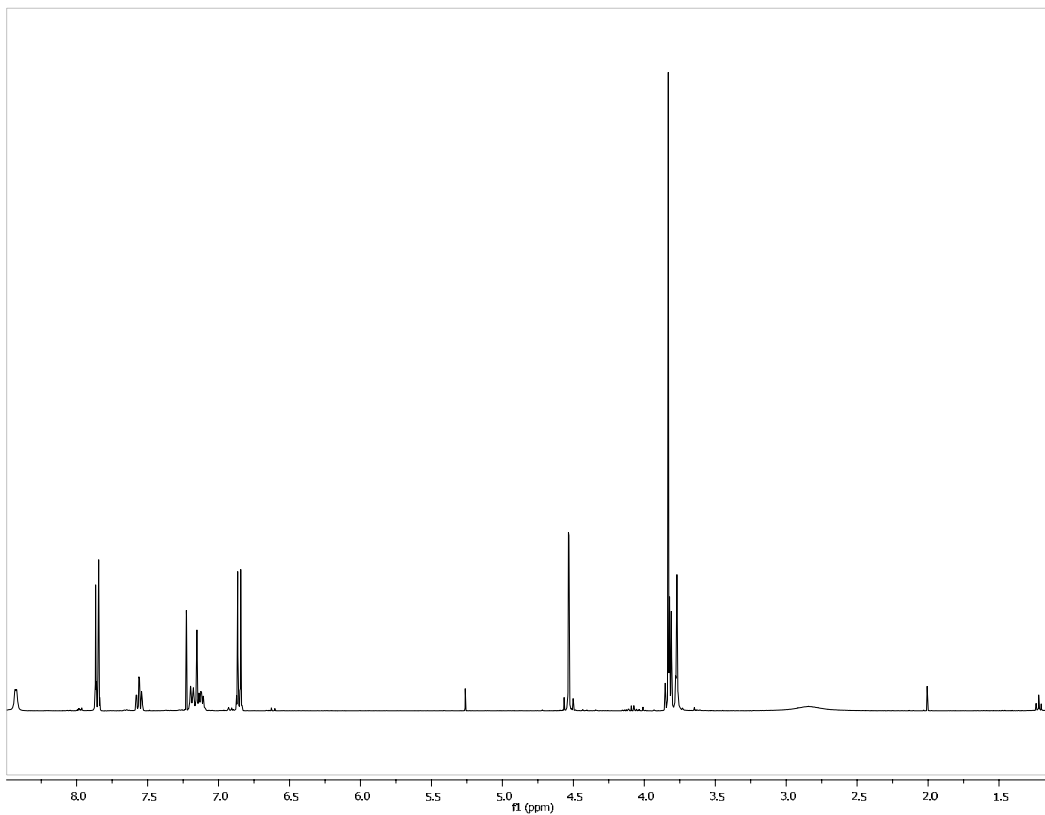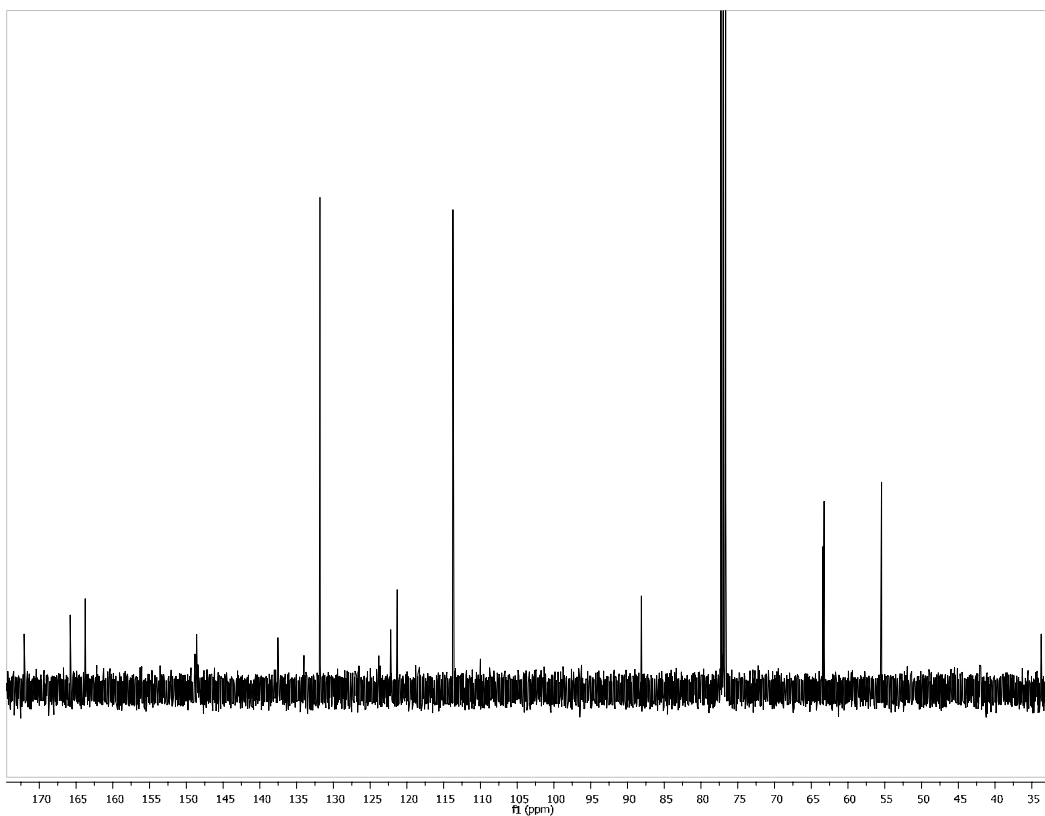

$^1\text{H}$  and  $^{13}\text{C}$  spectra of 12g-Z



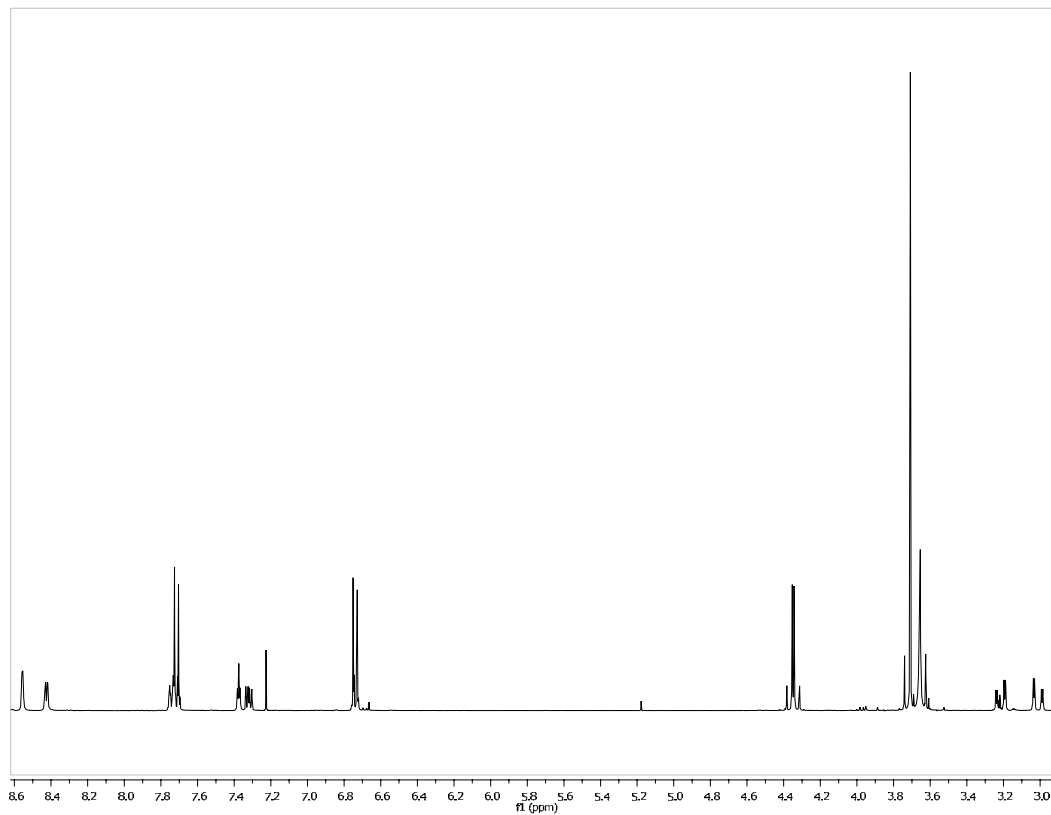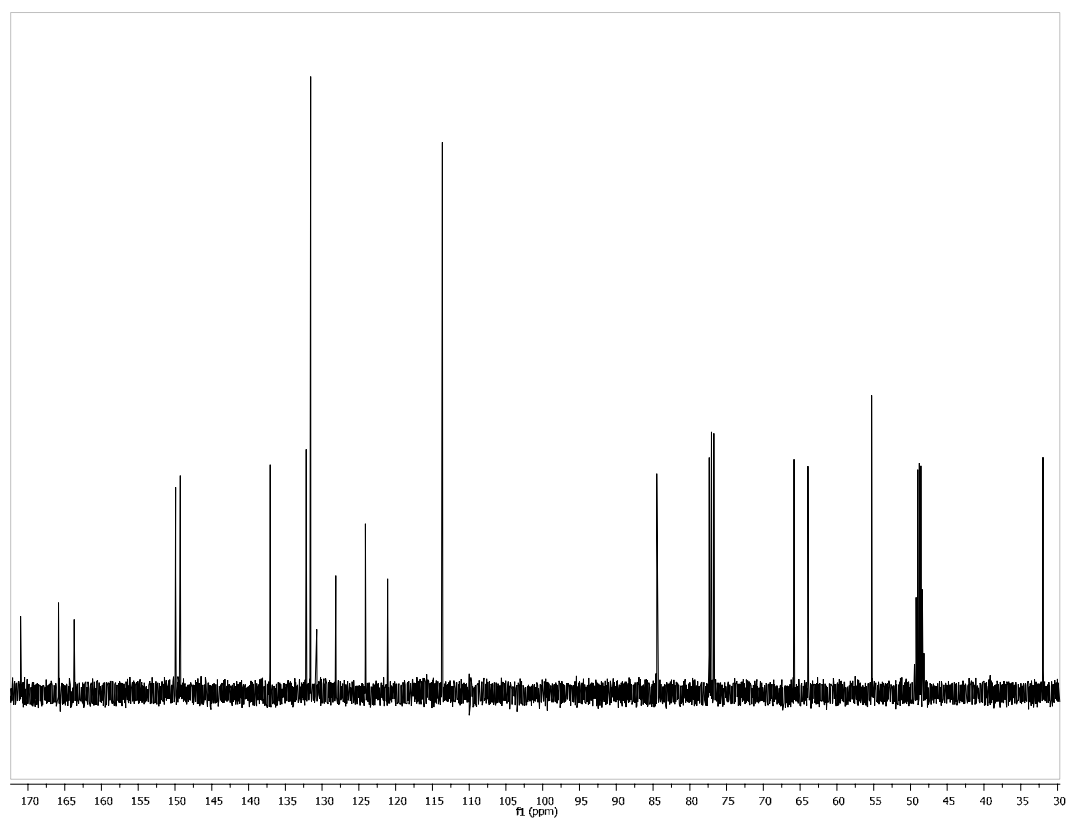

$^1\text{H}$  and  $^{13}\text{C}$  spectra of **12h-E**

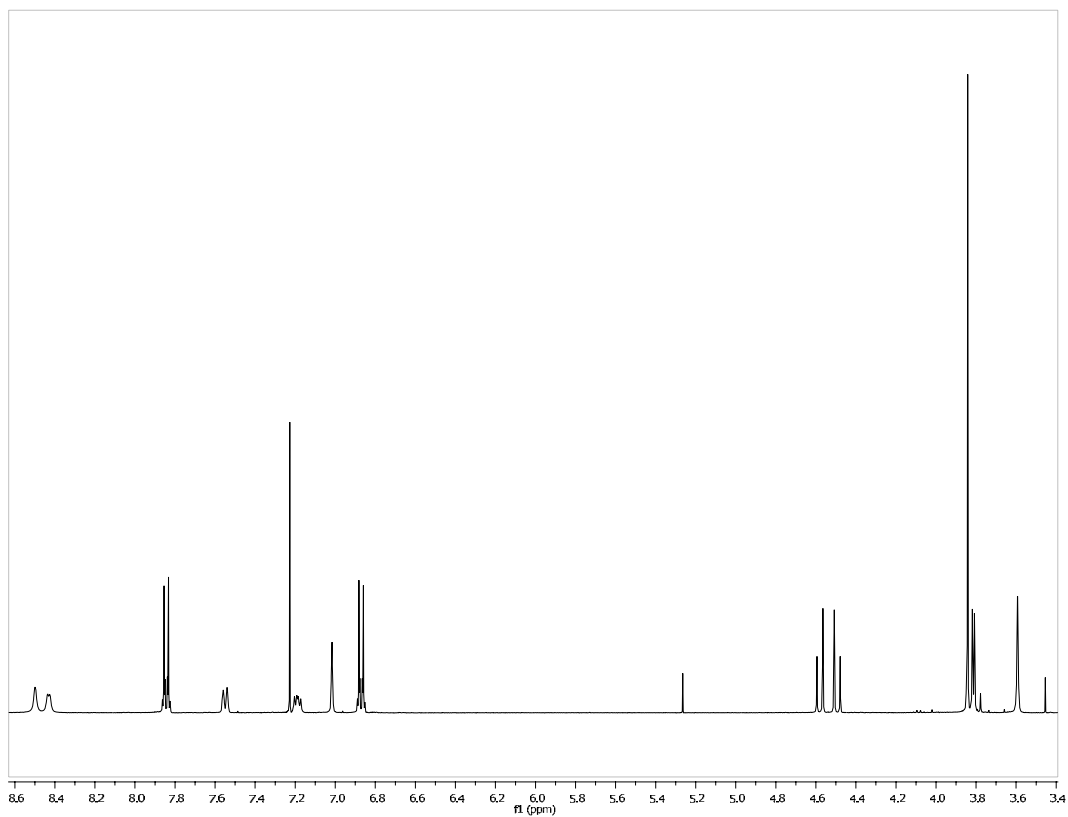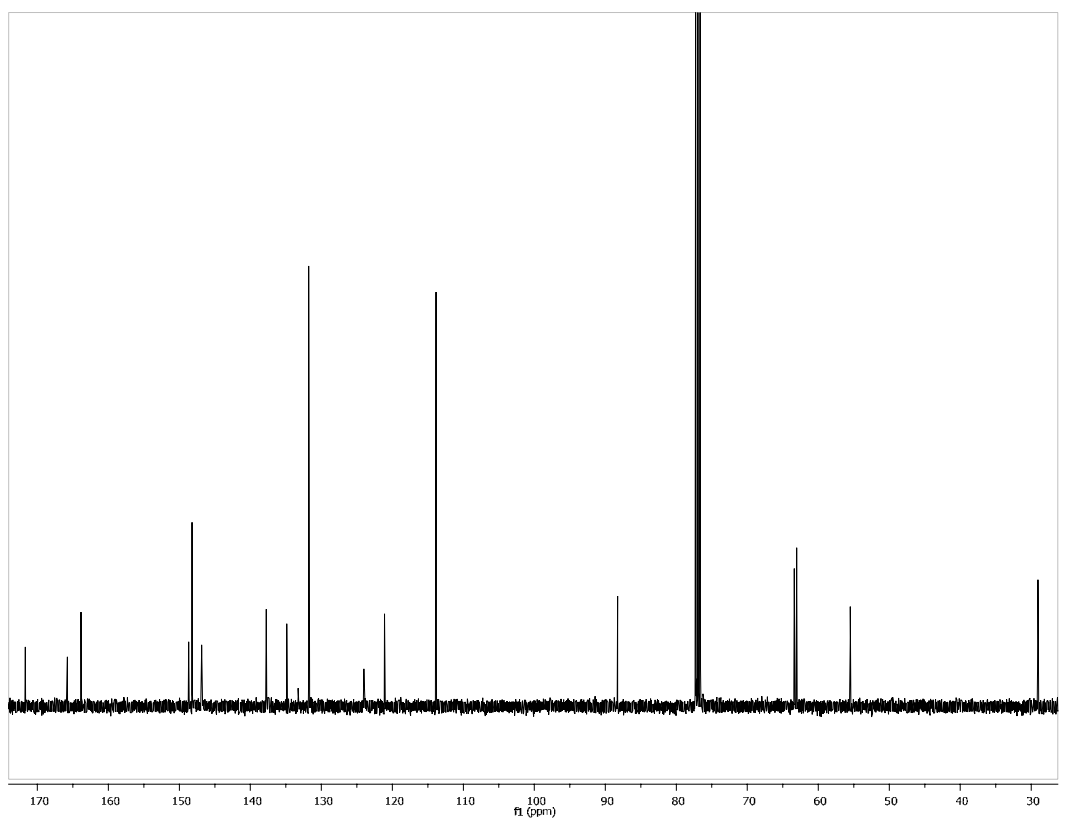

$^1\text{H}$  and  $^{13}\text{C}$  spectra of **12h-Z**

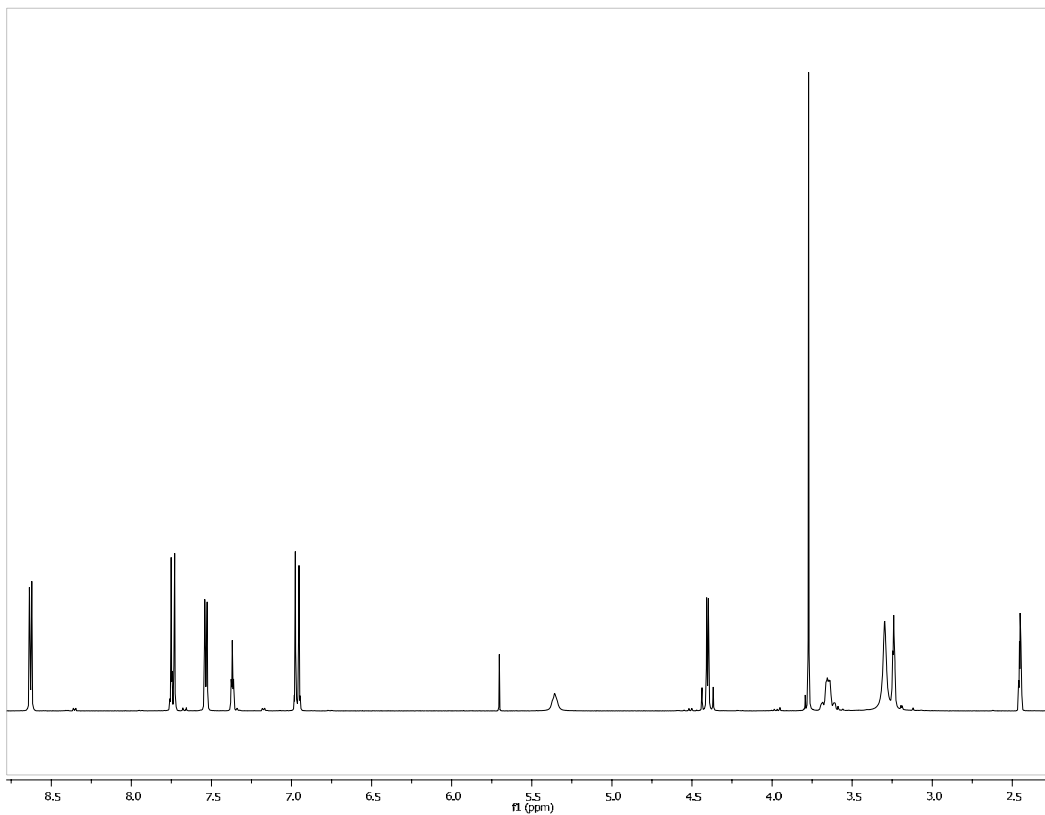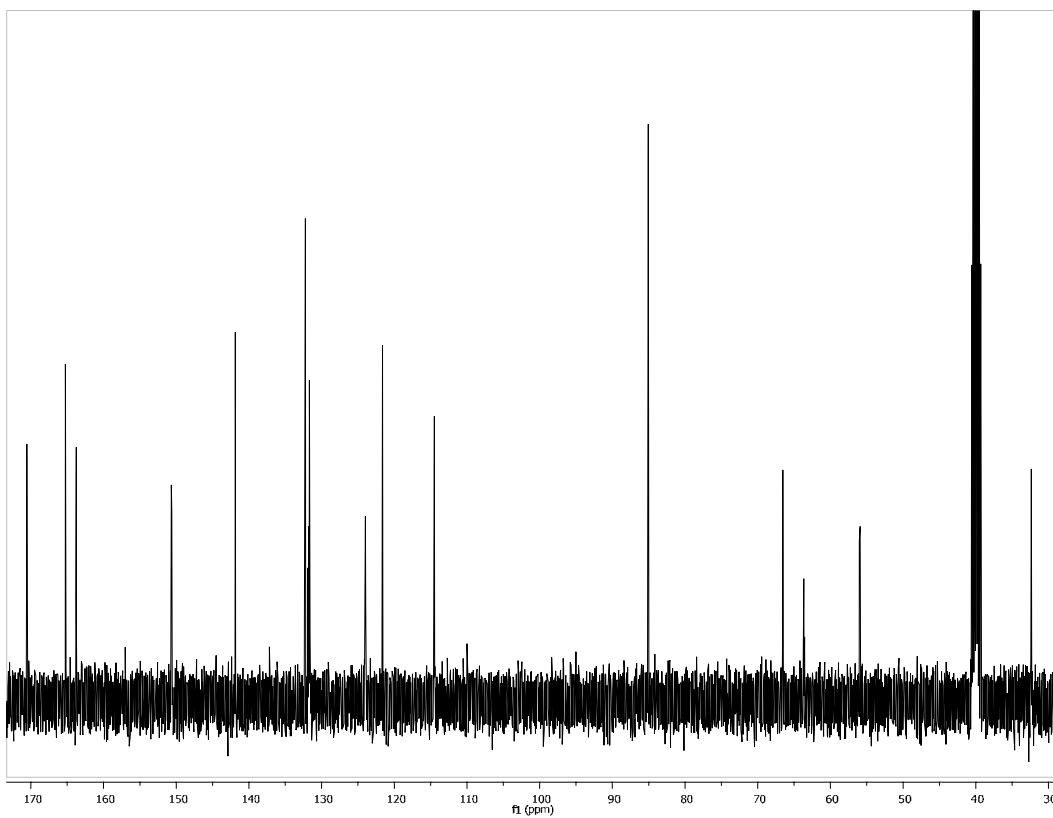

$^1\text{H}$  and  $^{13}\text{C}$  spectra of **12i-E**

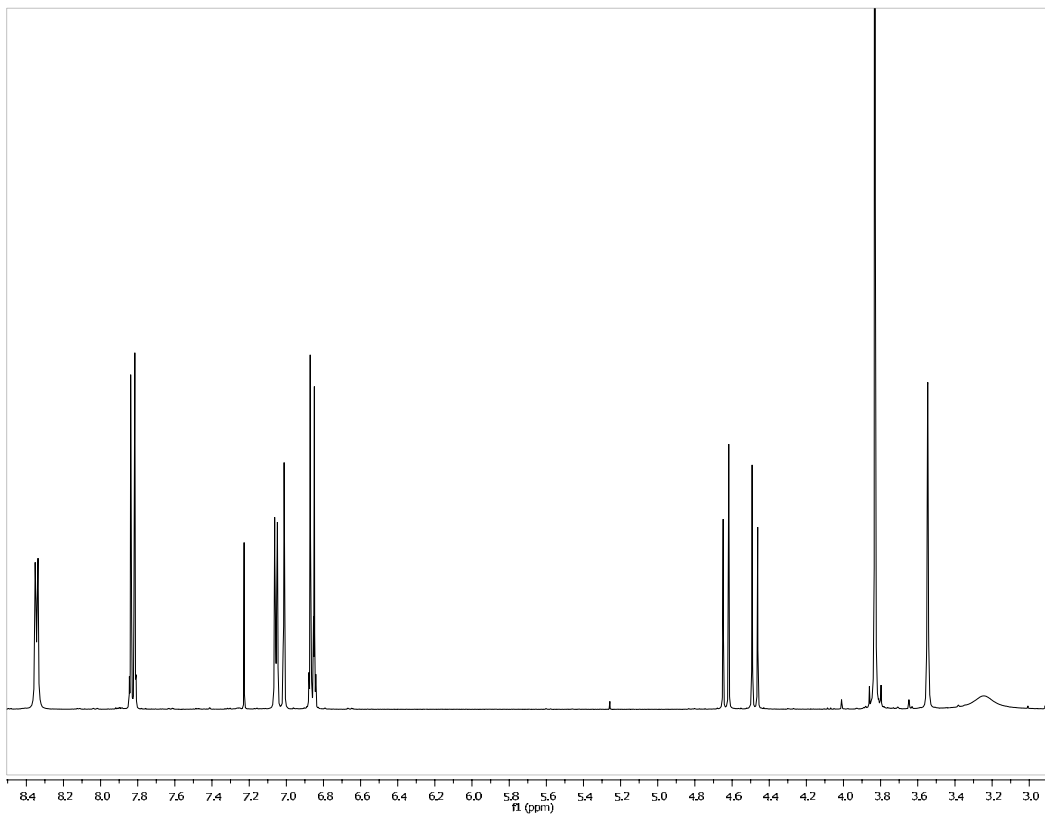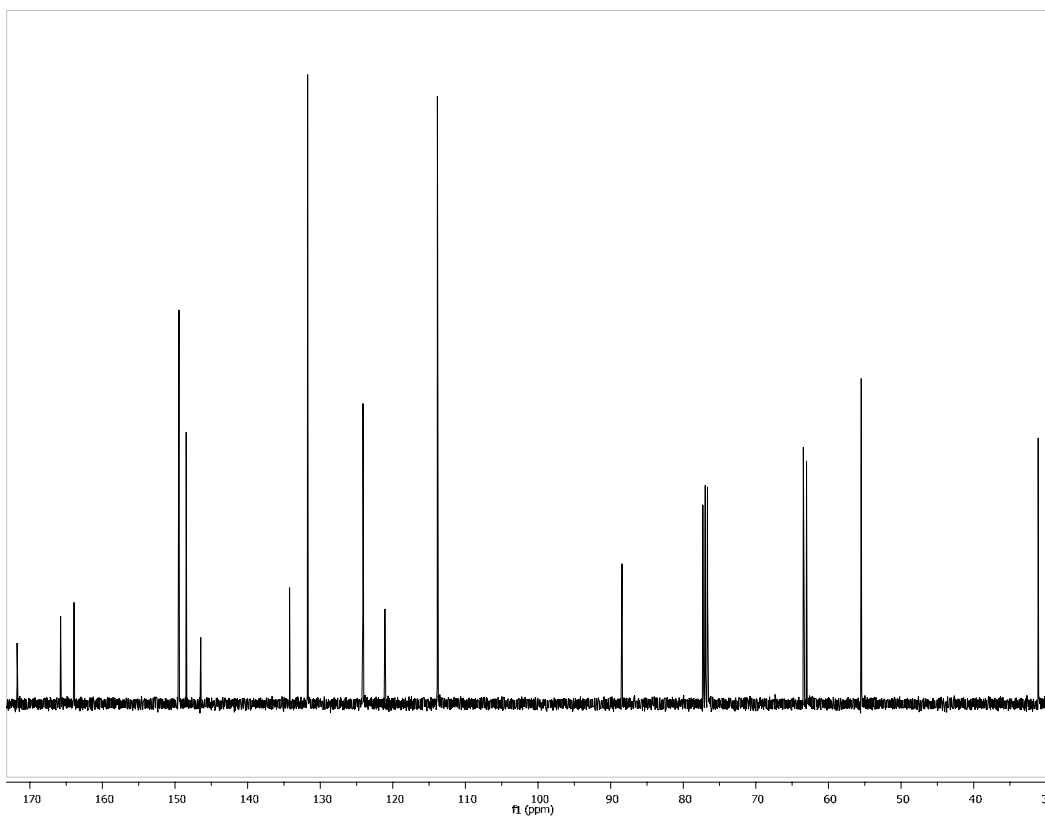

$^1\text{H}$  and  $^{13}\text{C}$  spectra of **12i-Z**

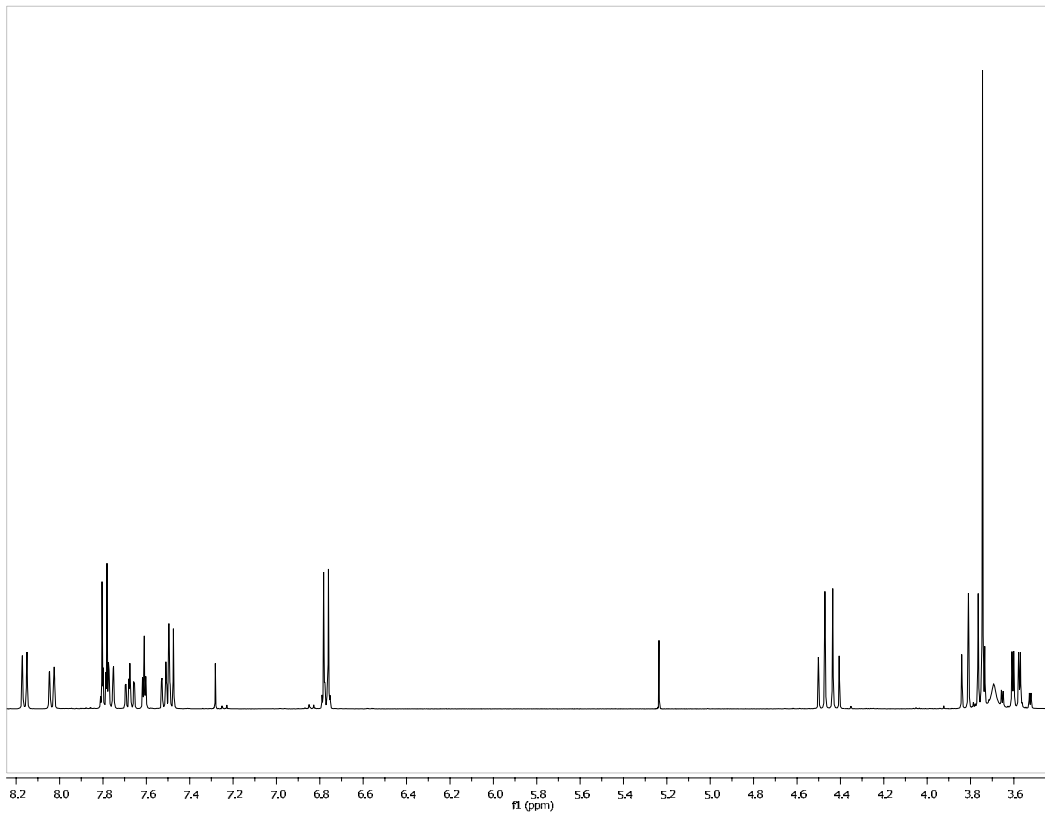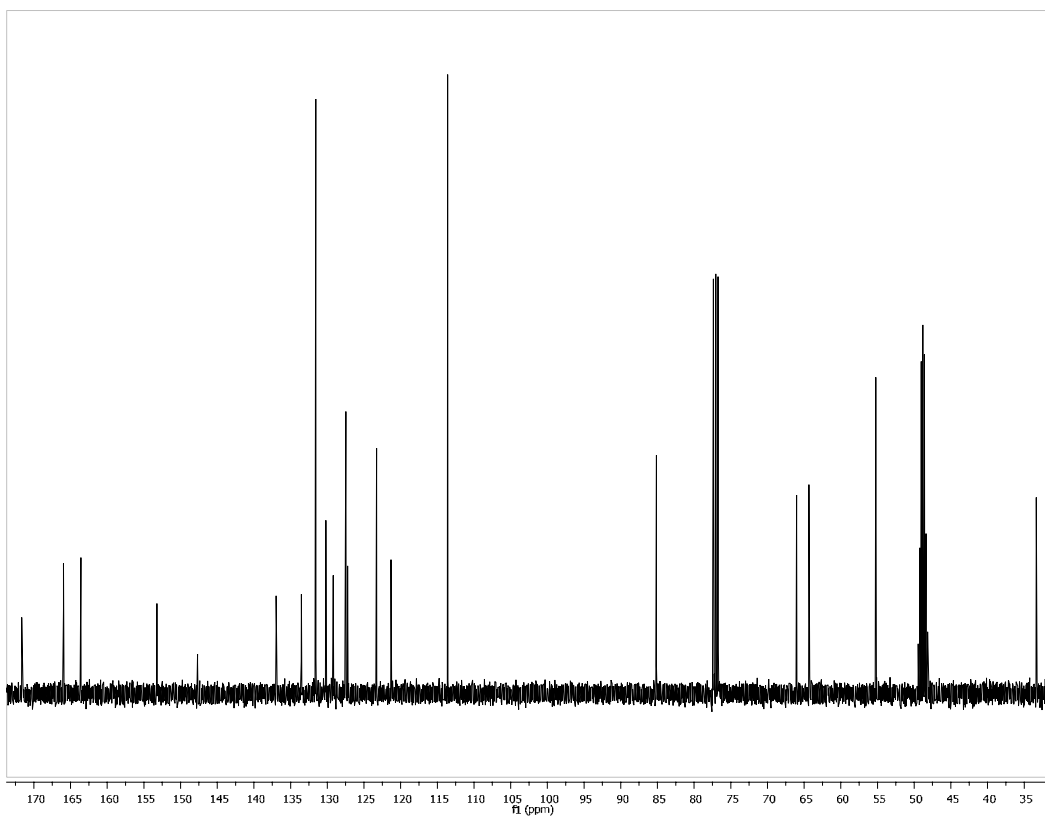

$^1\text{H}$  and  $^{13}\text{C}$  spectra of **12j-E**

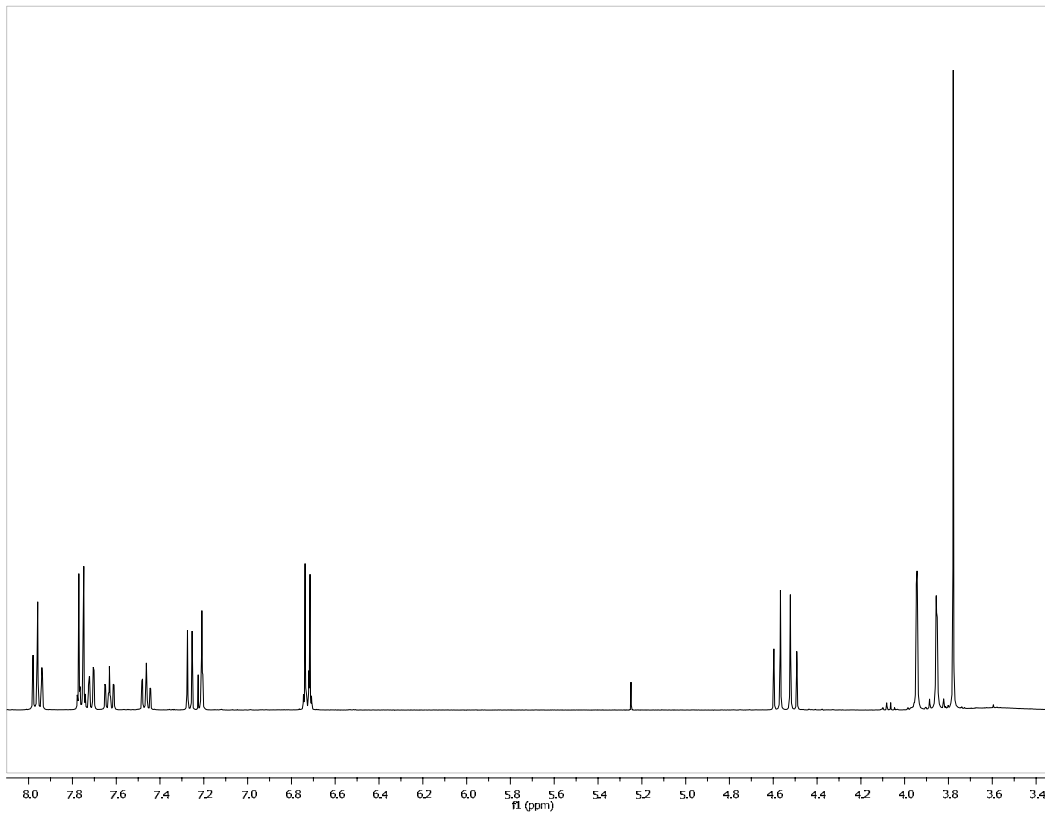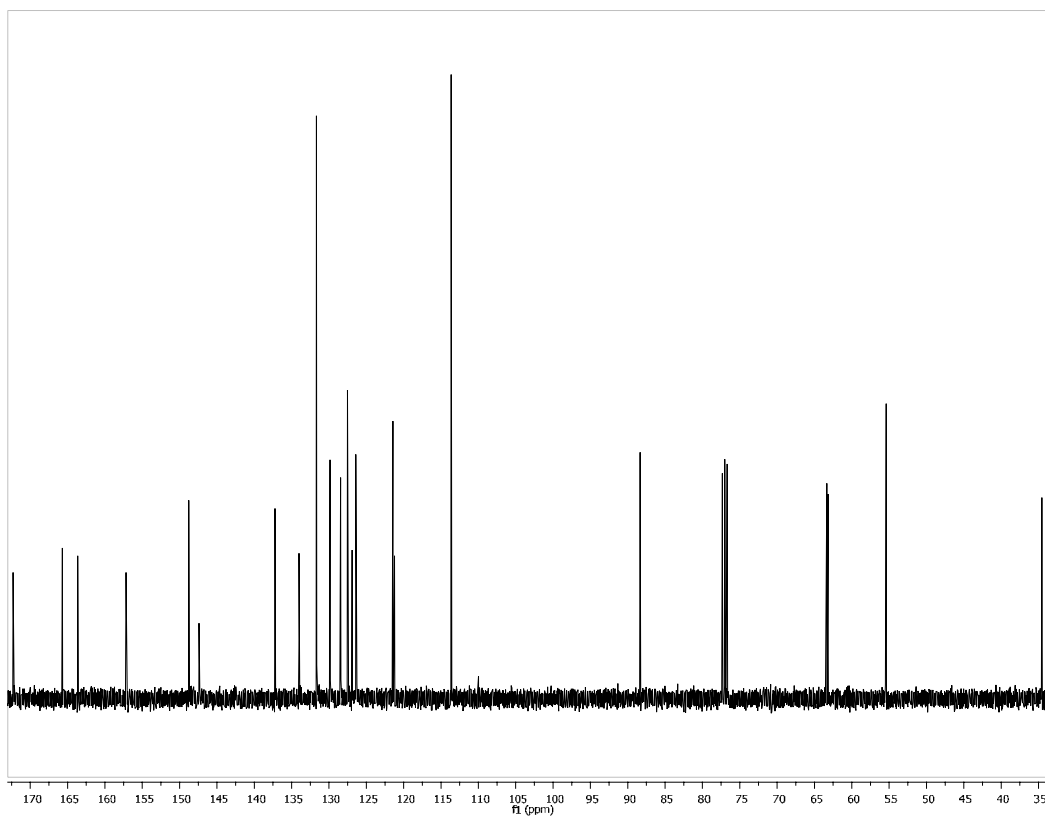

$^1\text{H}$  and  $^{13}\text{C}$  spectra of **12j-Z**

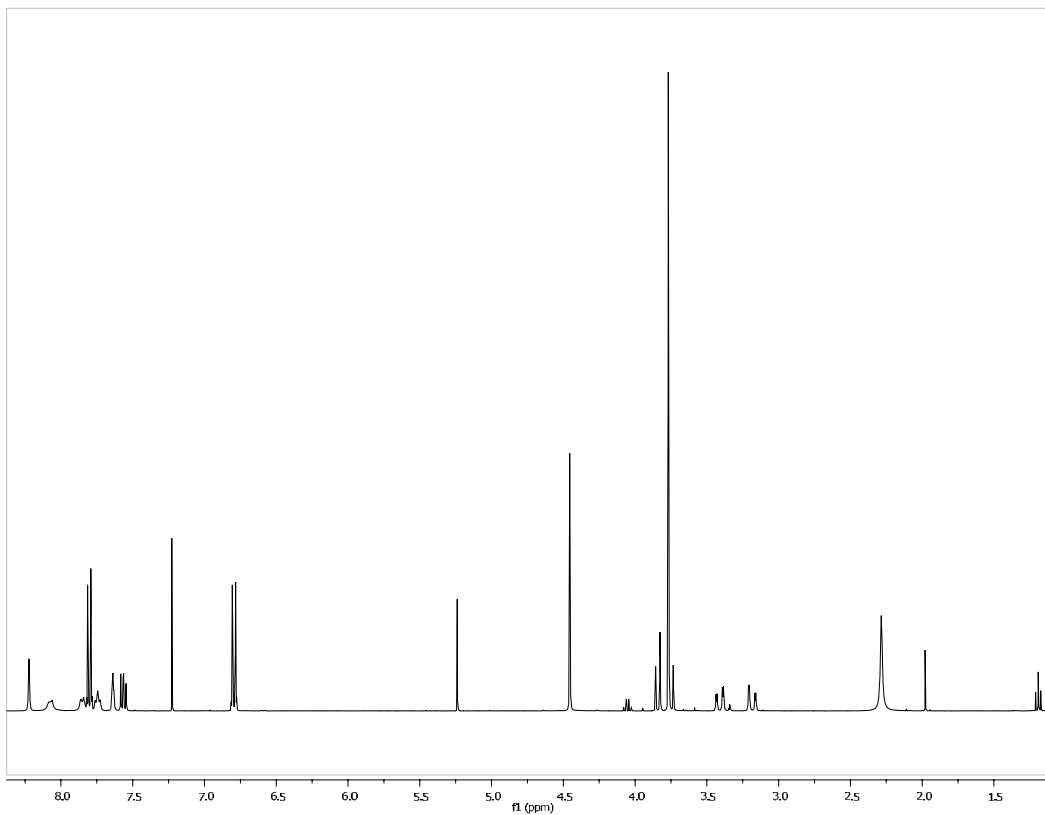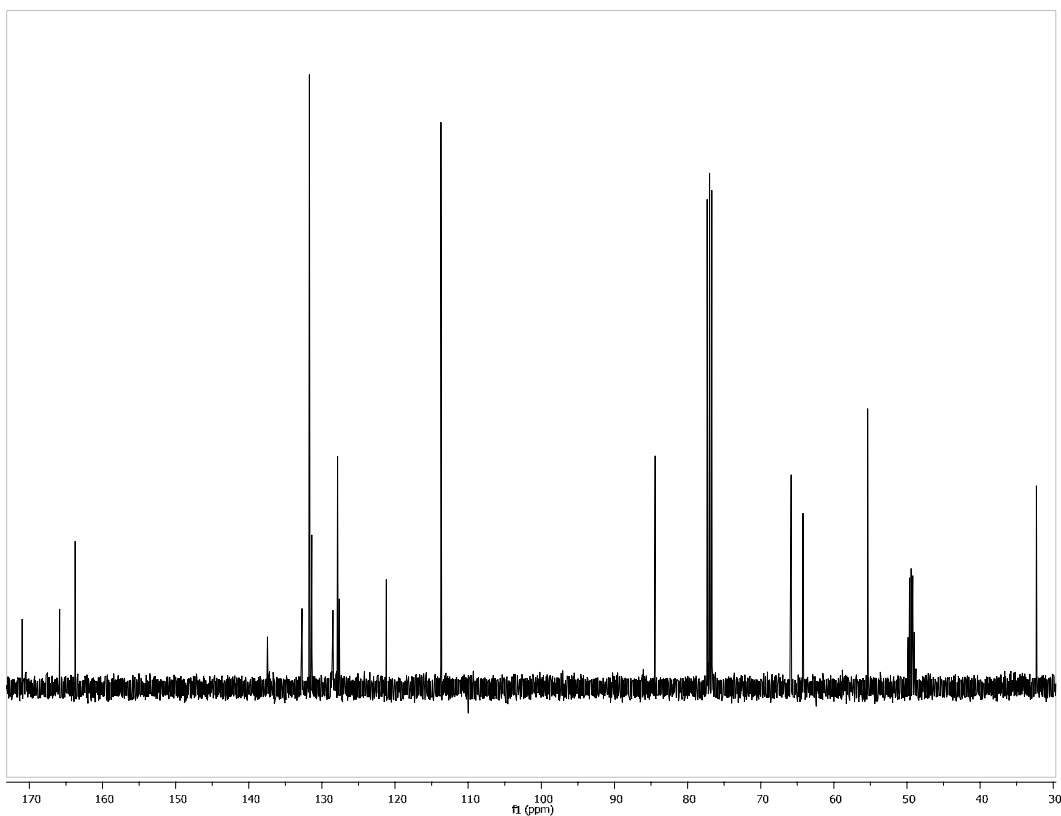

$^1\text{H}$  and  $^{13}\text{C}$  spectra of **12k-E**

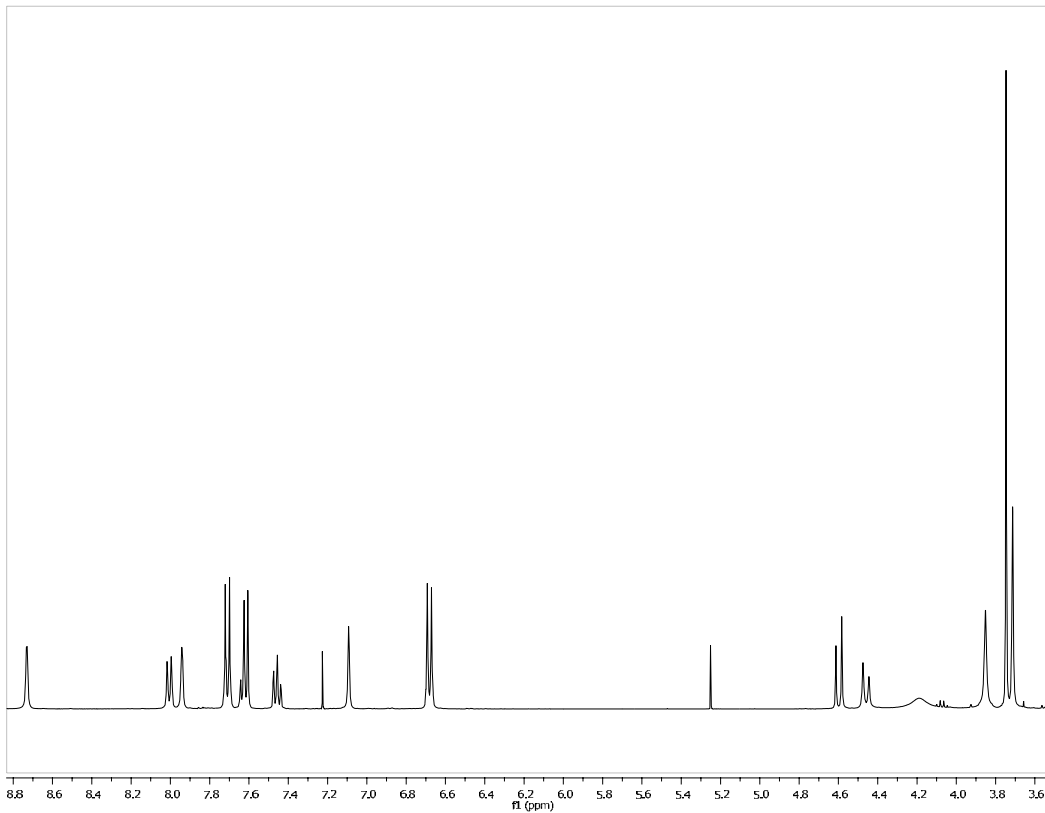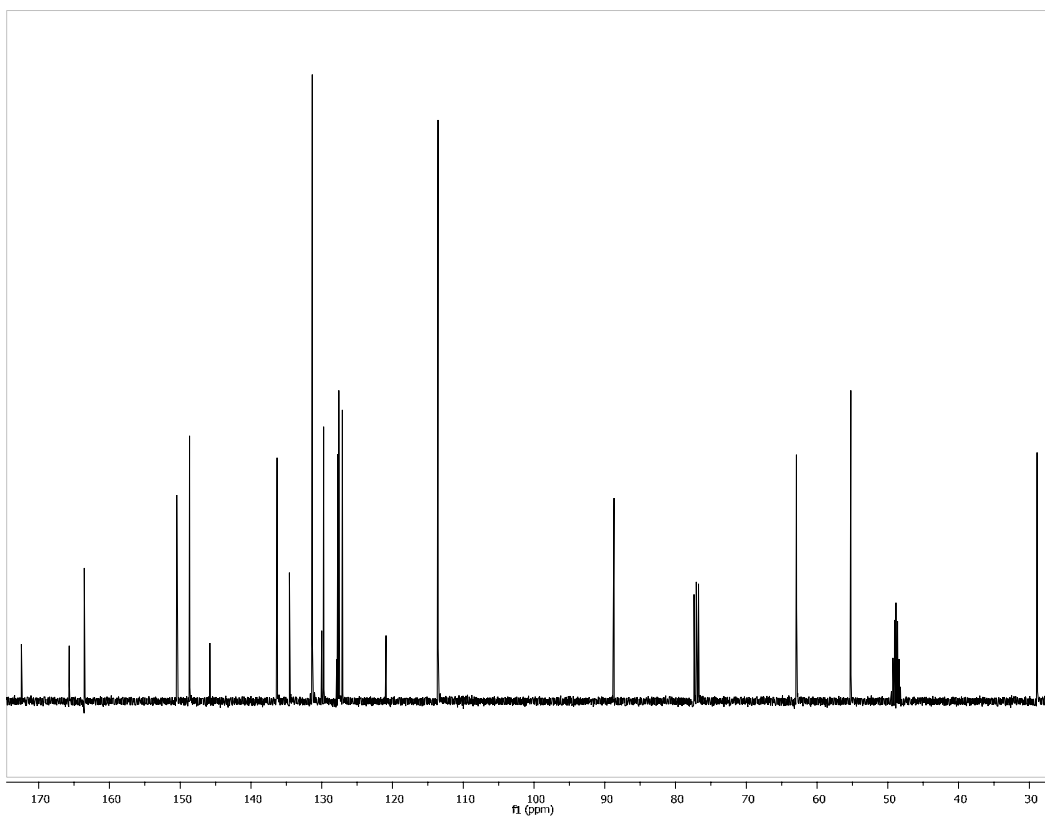

$^1\text{H}$  and  $^{13}\text{C}$  spectra of 12k-Z



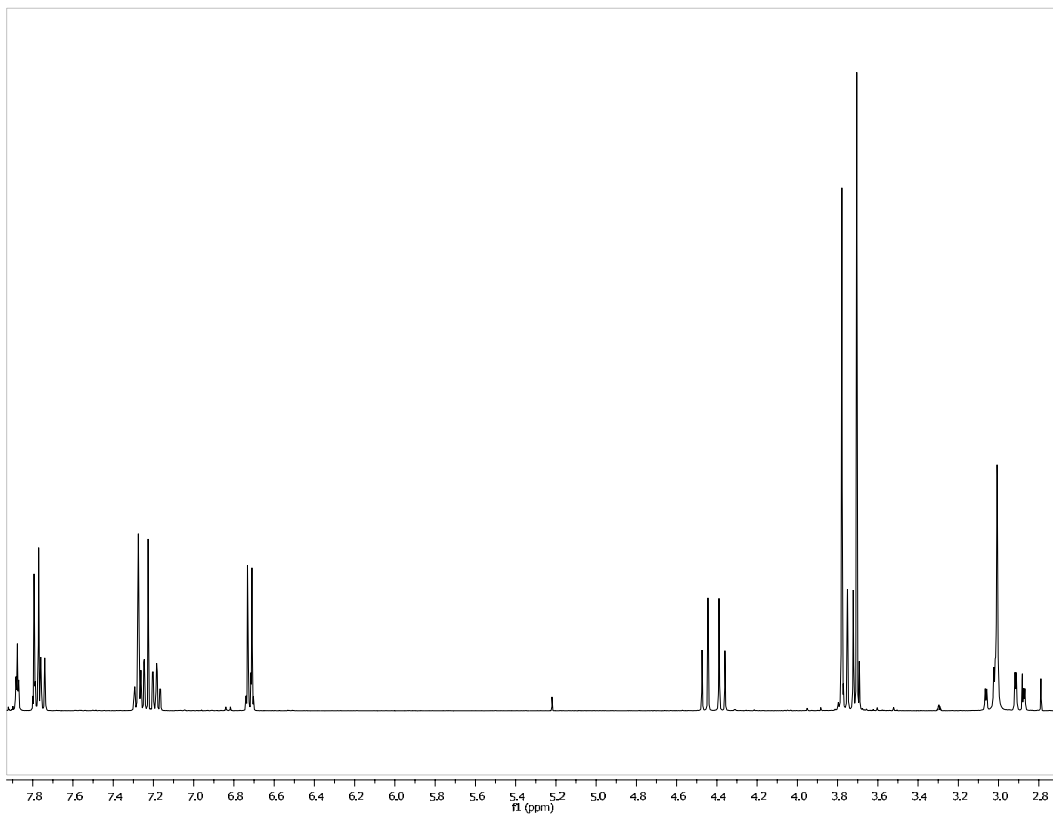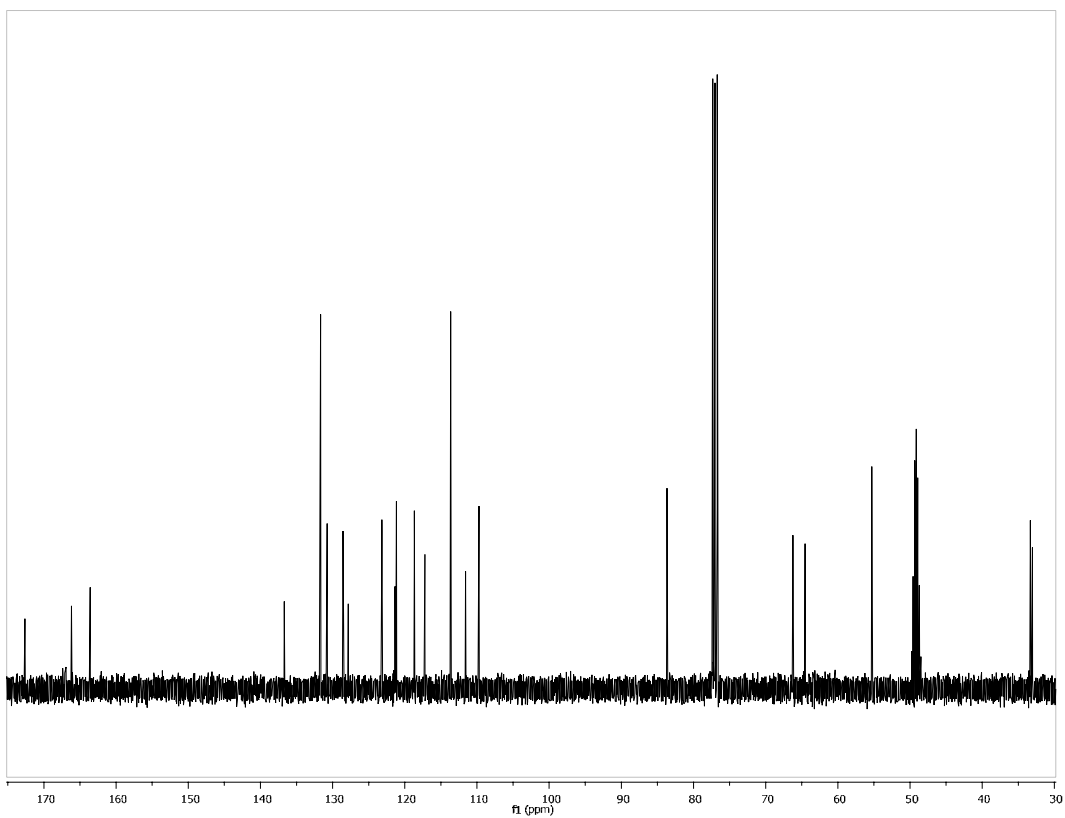

$^1\text{H}$  and  $^{13}\text{C}$  spectra of **12l-E**

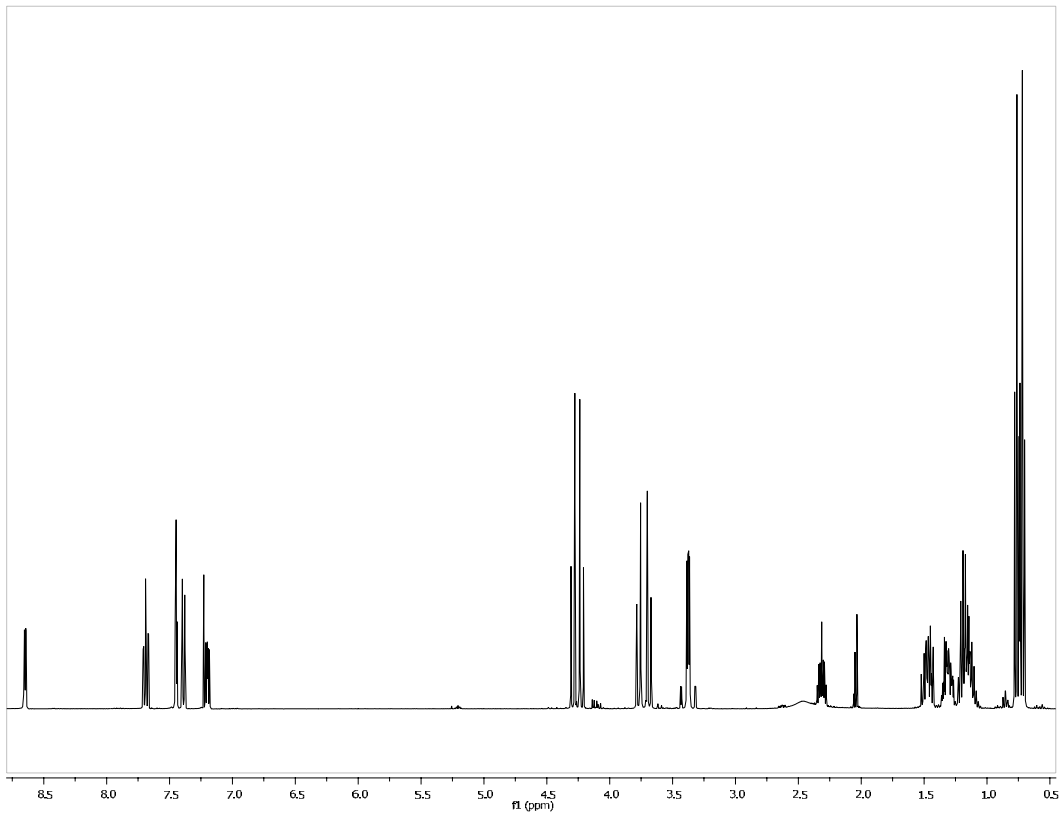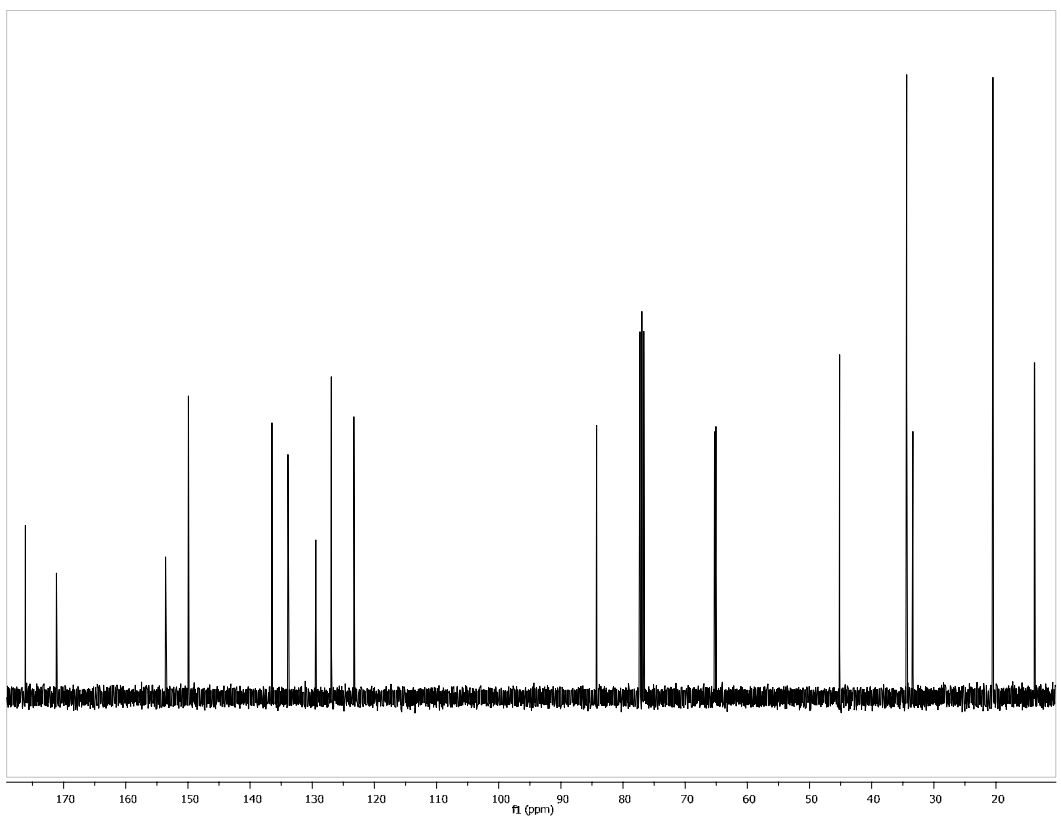

$^1\text{H}$  and  $^{13}\text{C}$  spectra of **12m-E**

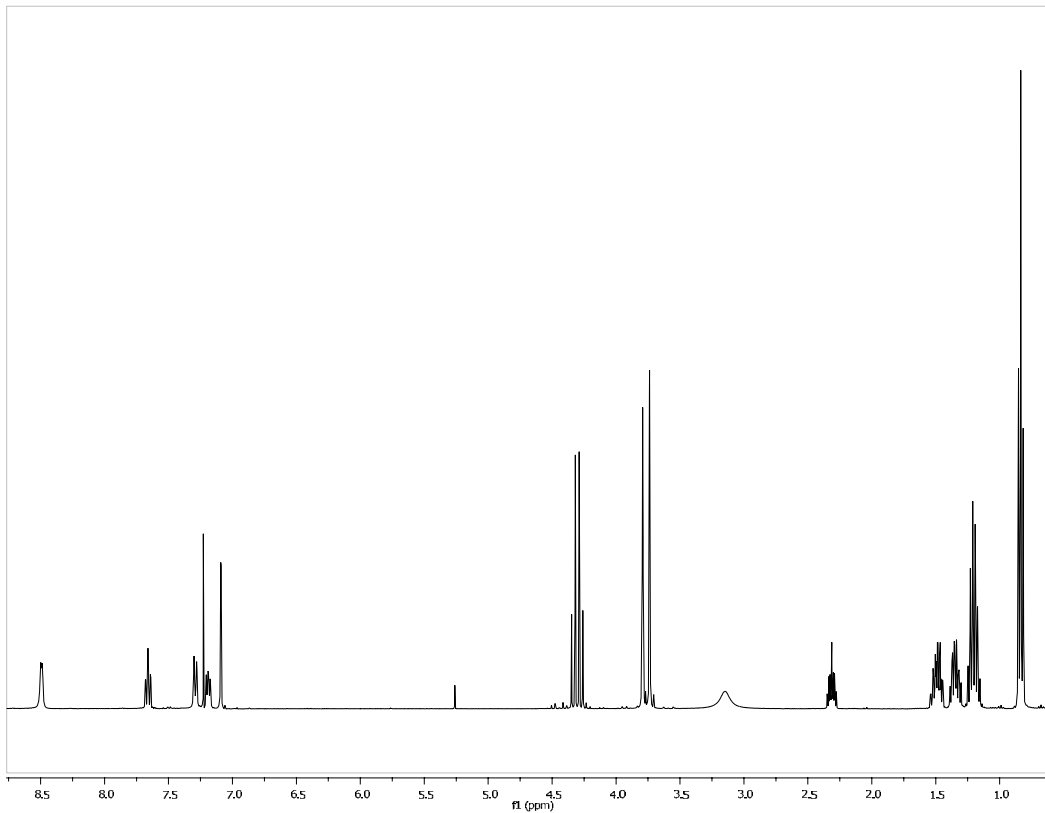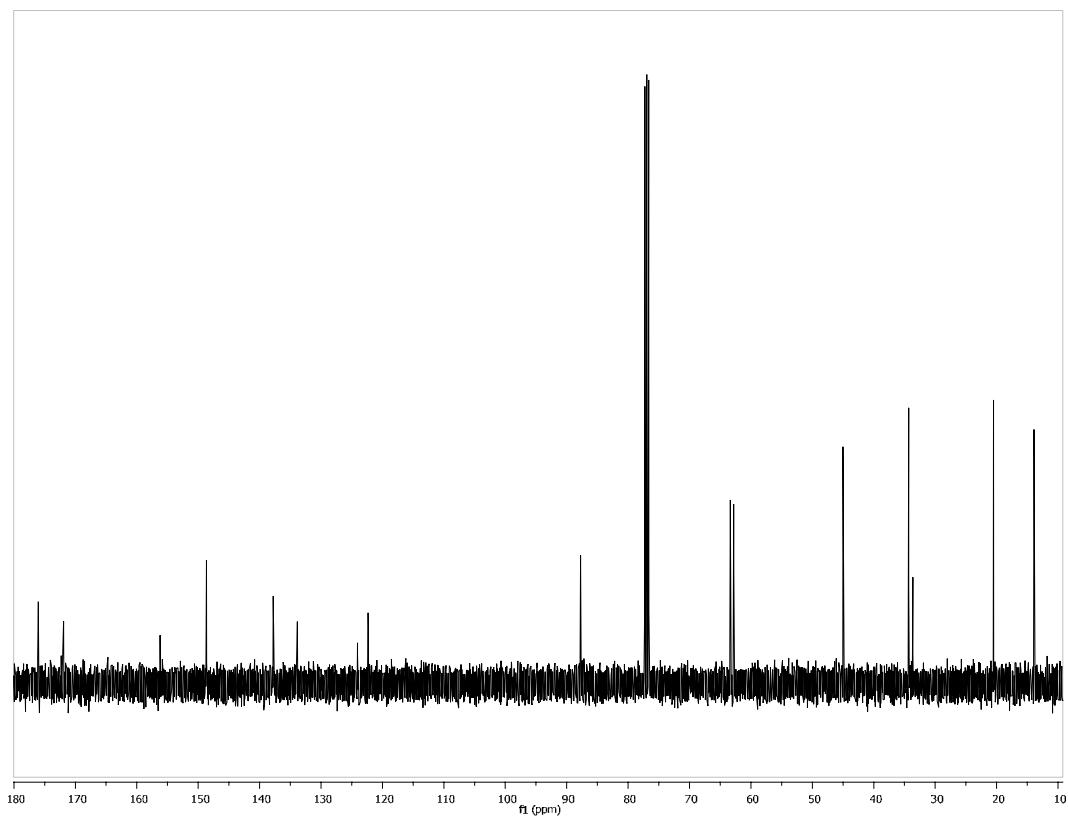

$^1\text{H}$  and  $^{13}\text{C}$  spectra of 12m-Z

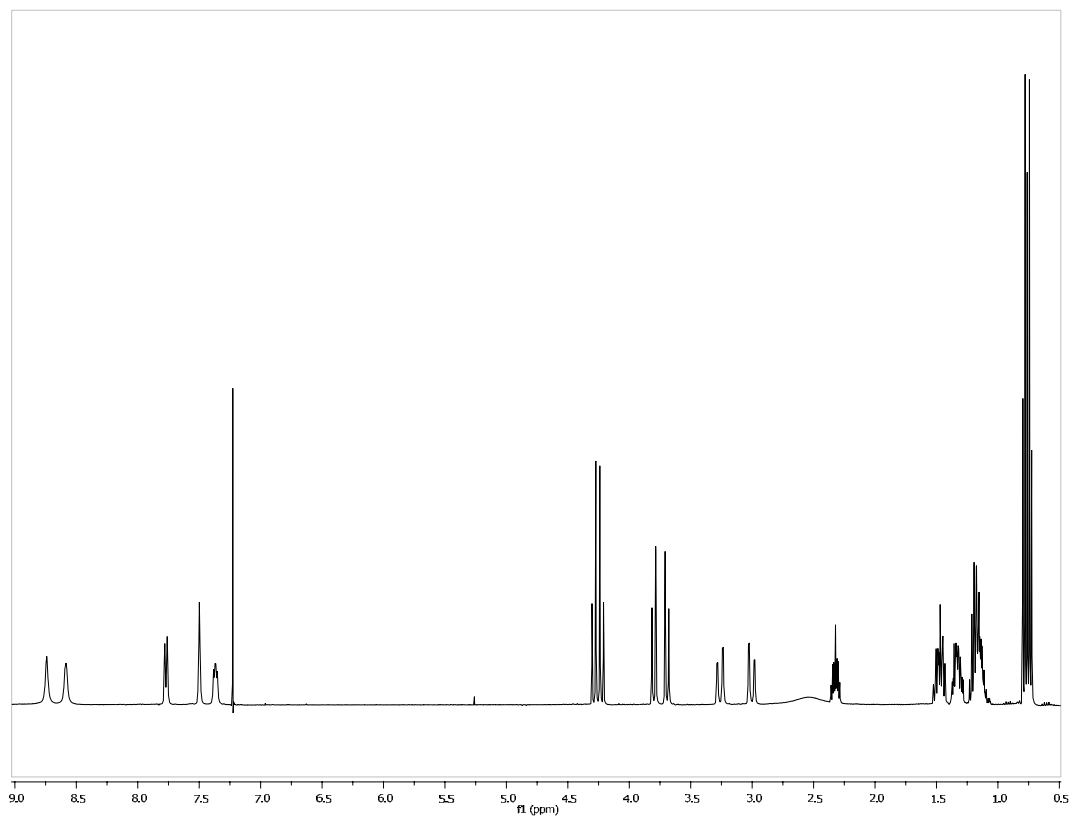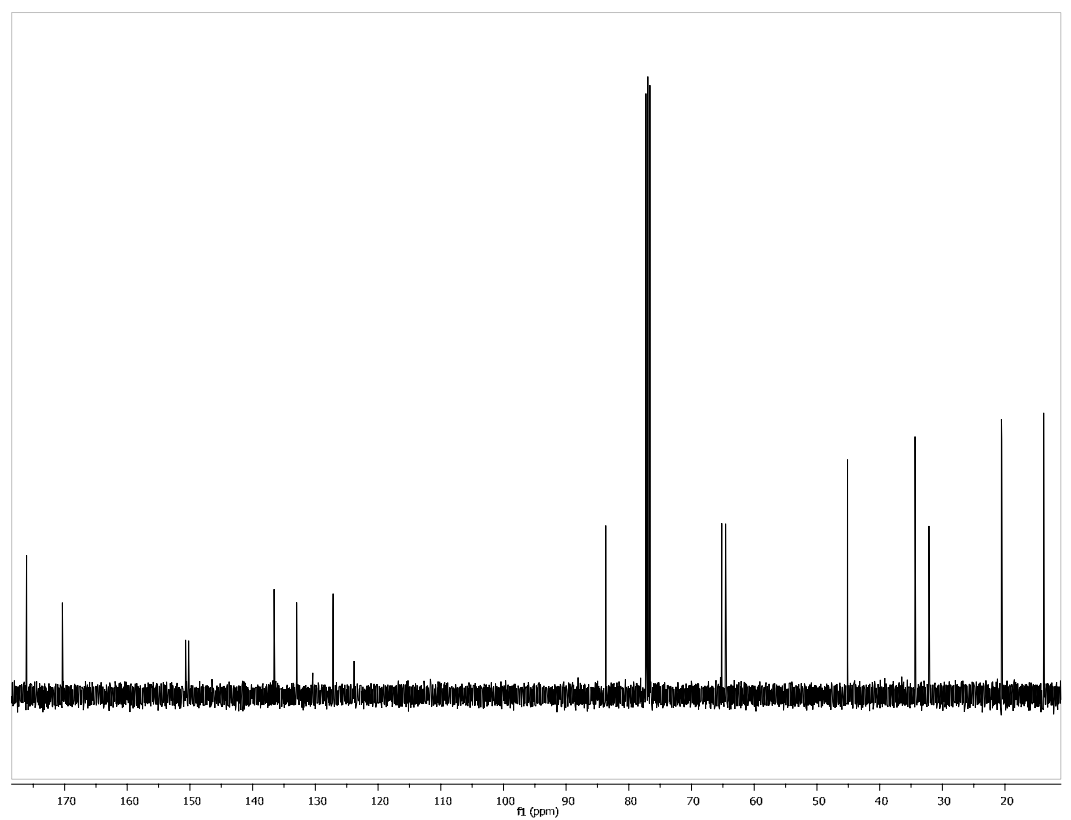

$^1\text{H}$  and  $^{13}\text{C}$  spectra of **12n-E**

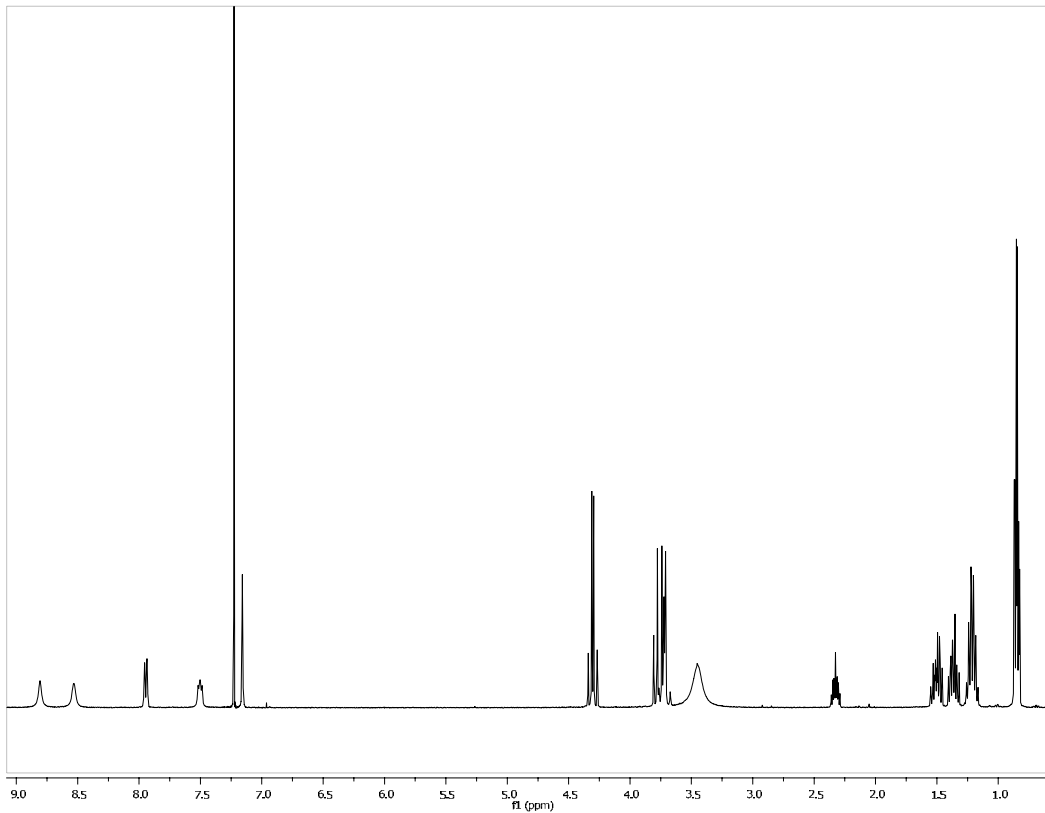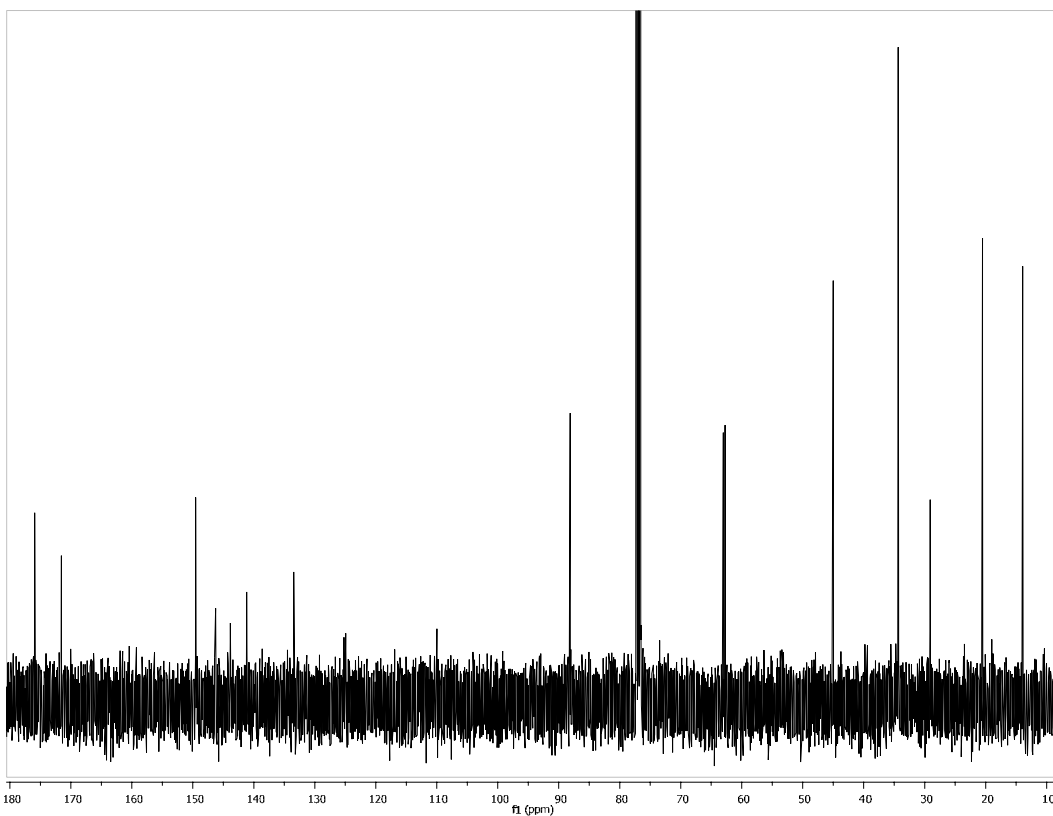

$^1\text{H}$  and  $^{13}\text{C}$  spectra of **12n-Z**

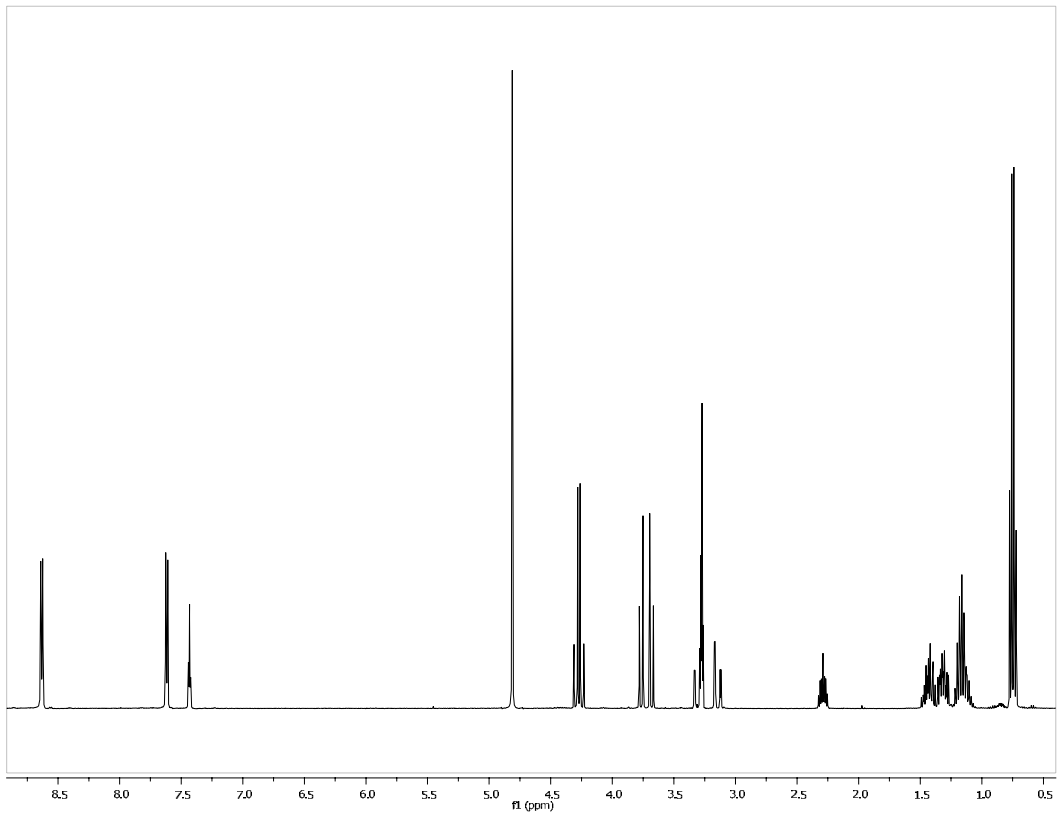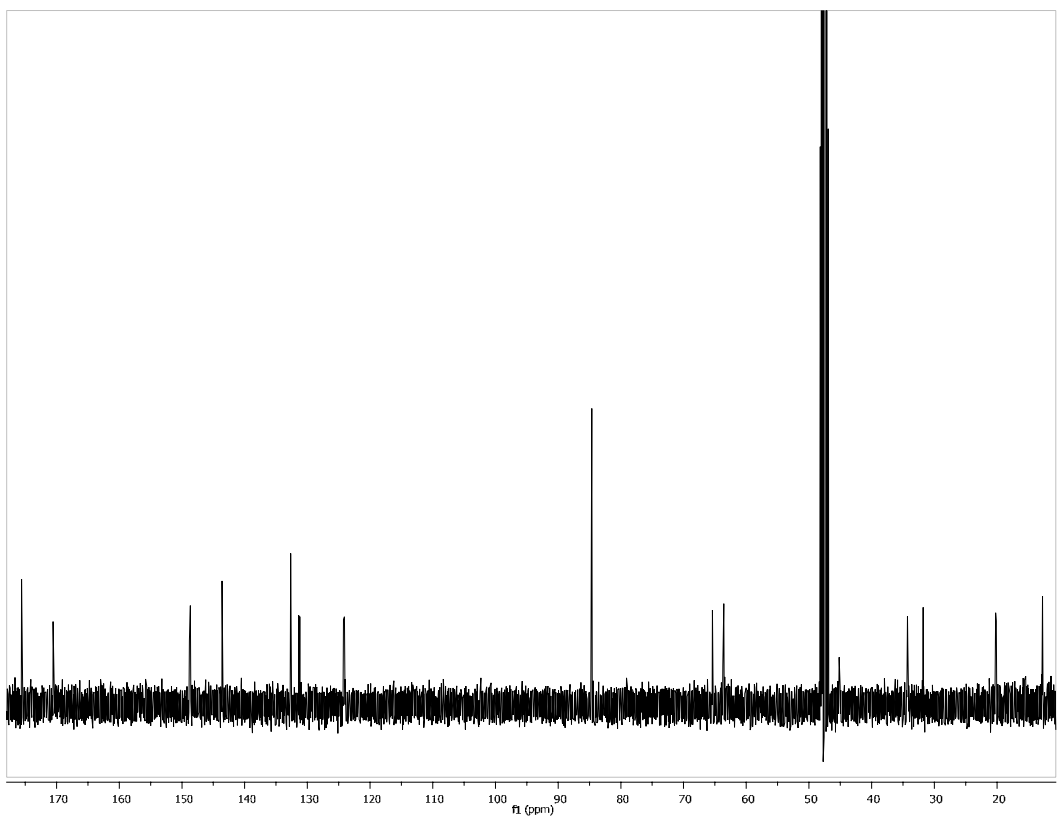

$^1\text{H}$  and  $^{13}\text{C}$  spectra of **12o-E**

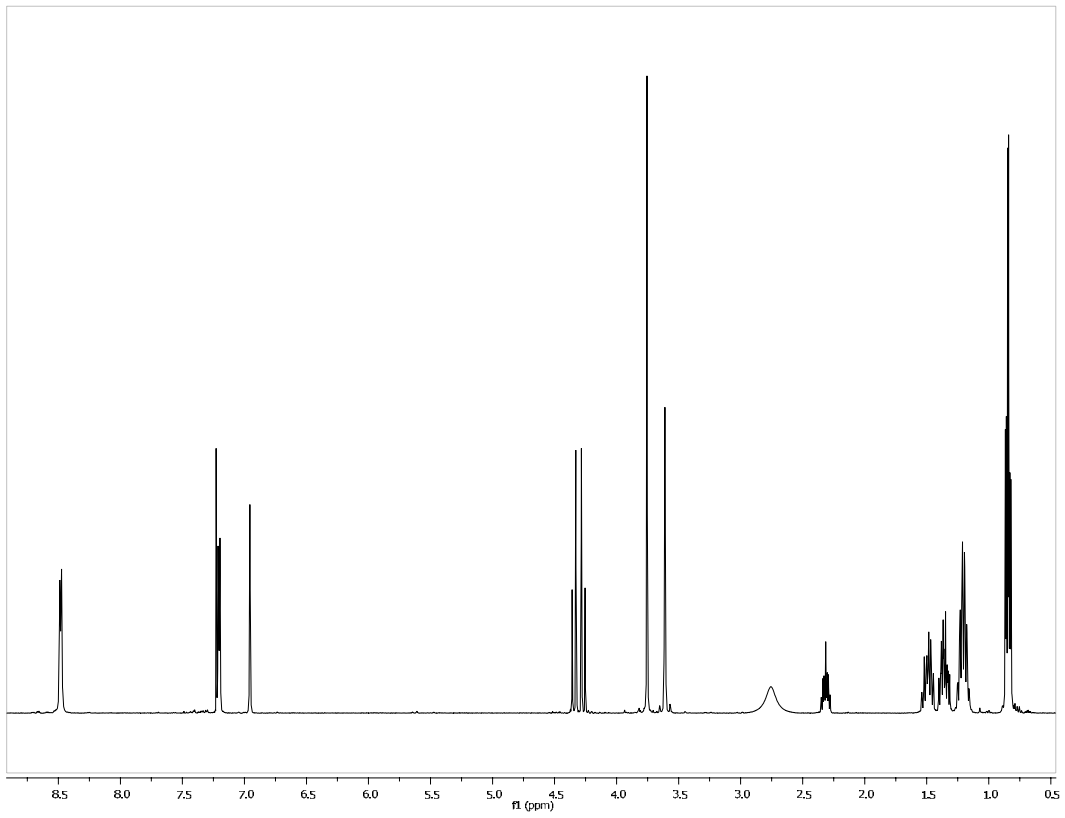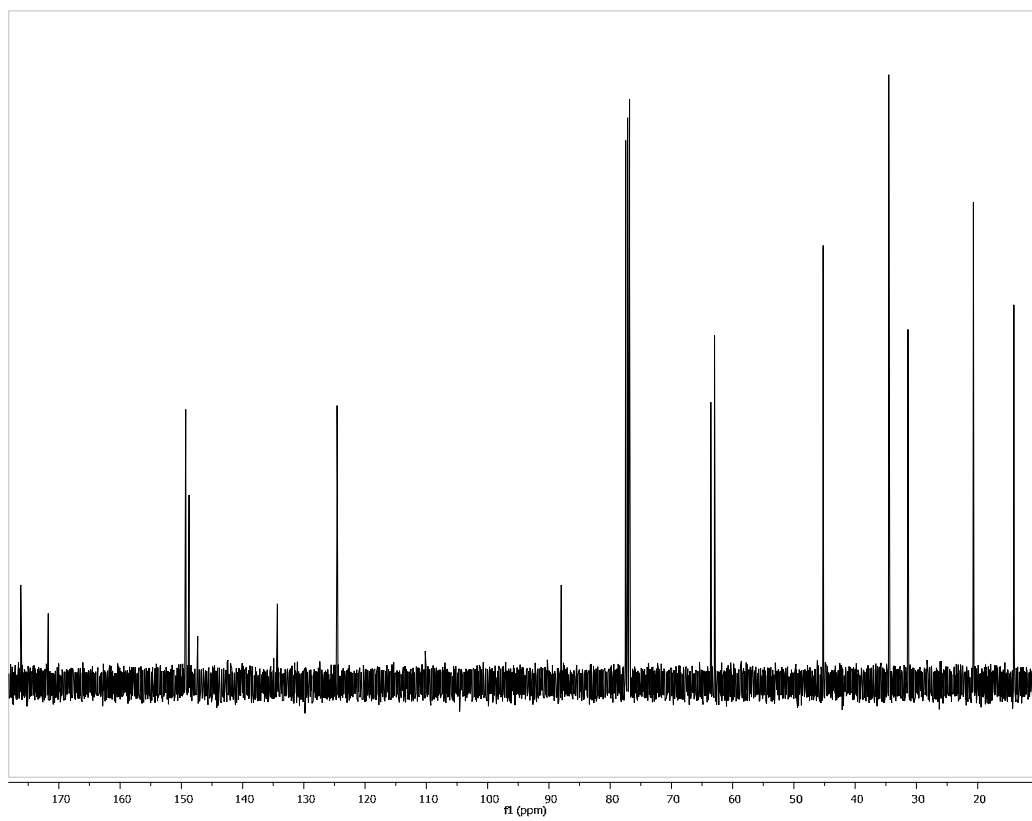

$^1\text{H}$  and  $^{13}\text{C}$  spectra of **12o-Z**

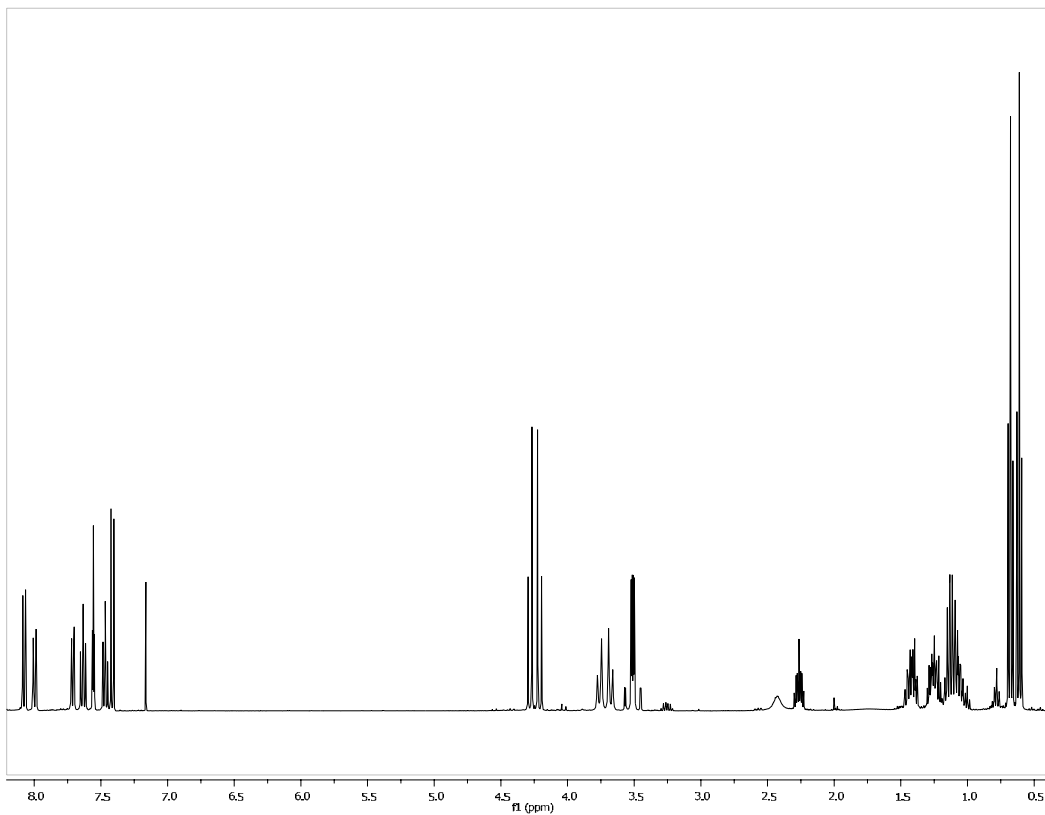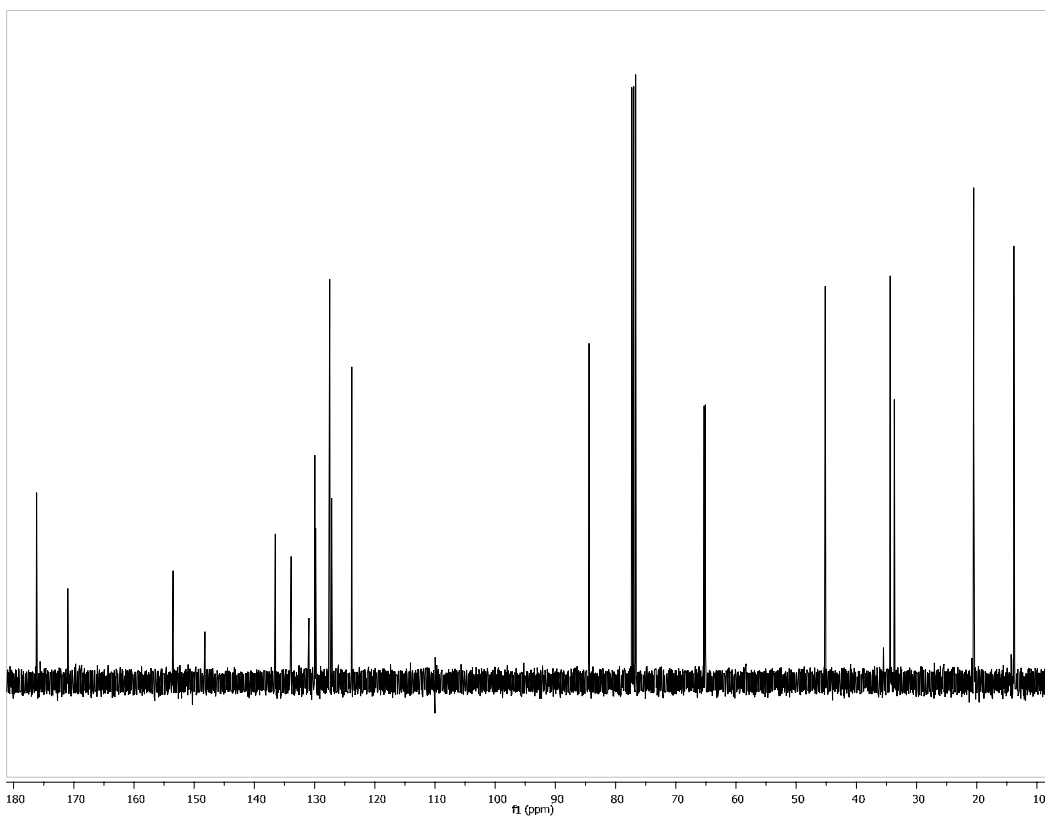

$^1\text{H}$  and  $^{13}\text{C}$  spectra of 12p-E



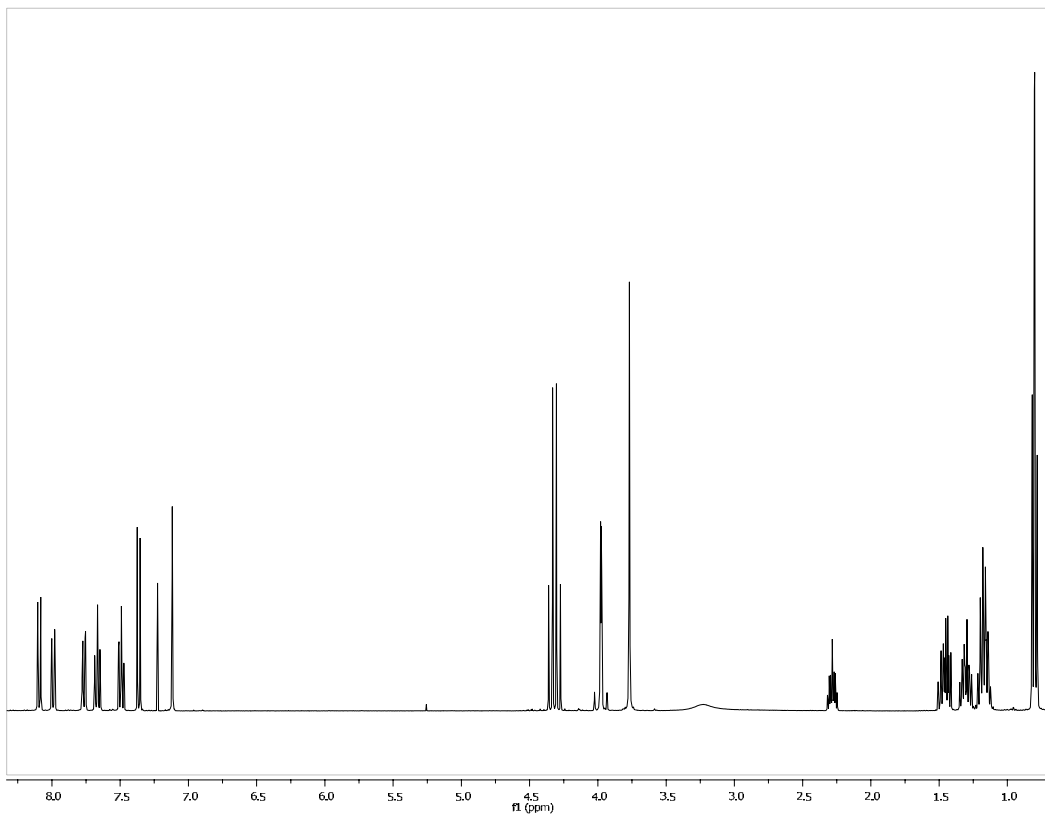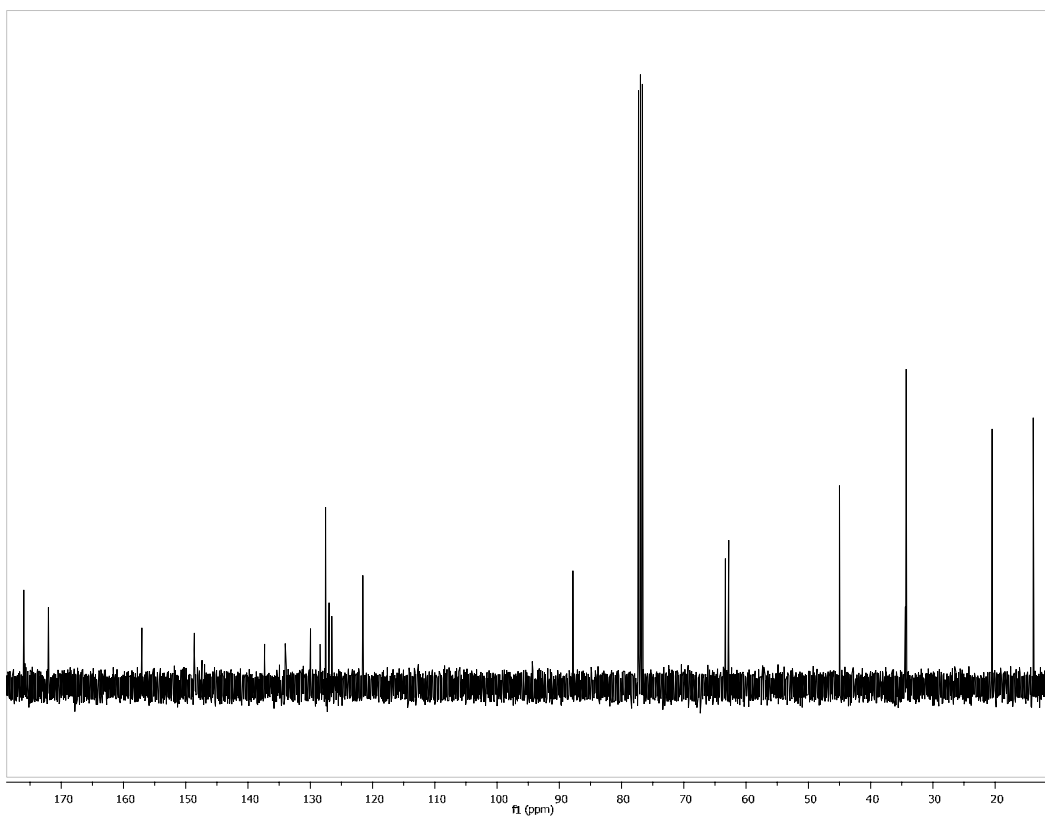

$^1\text{H}$  and  $^{13}\text{C}$  spectra of 12p-Z

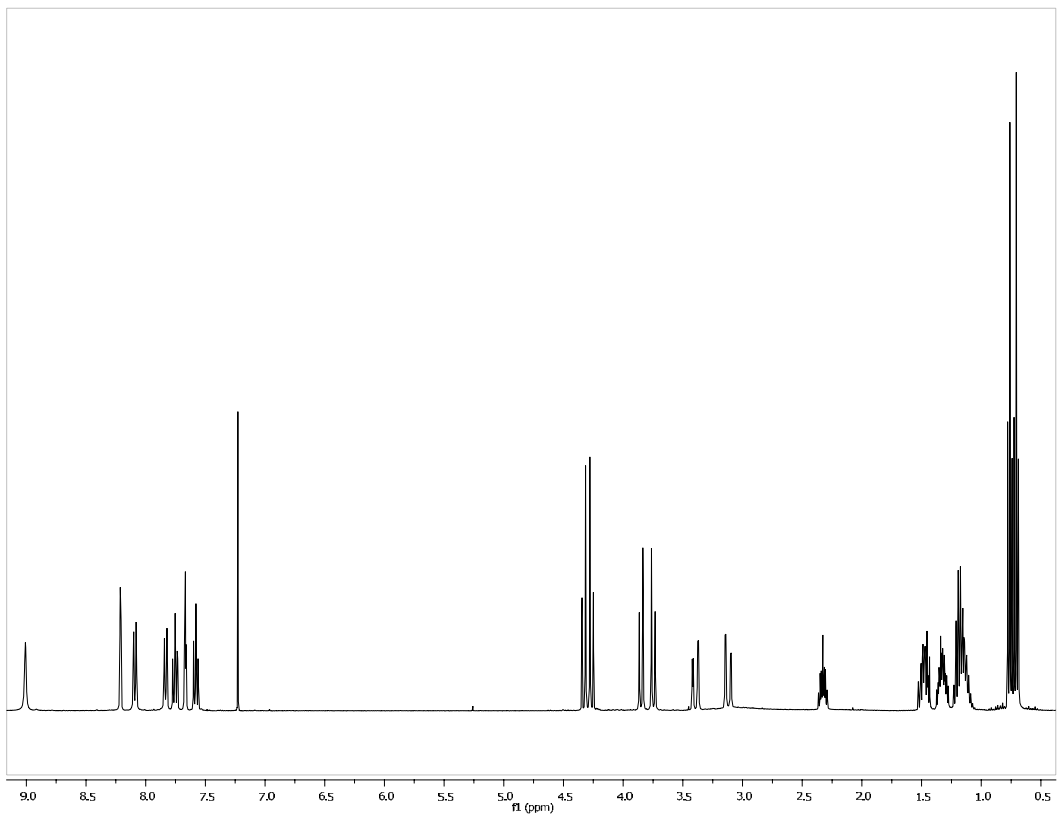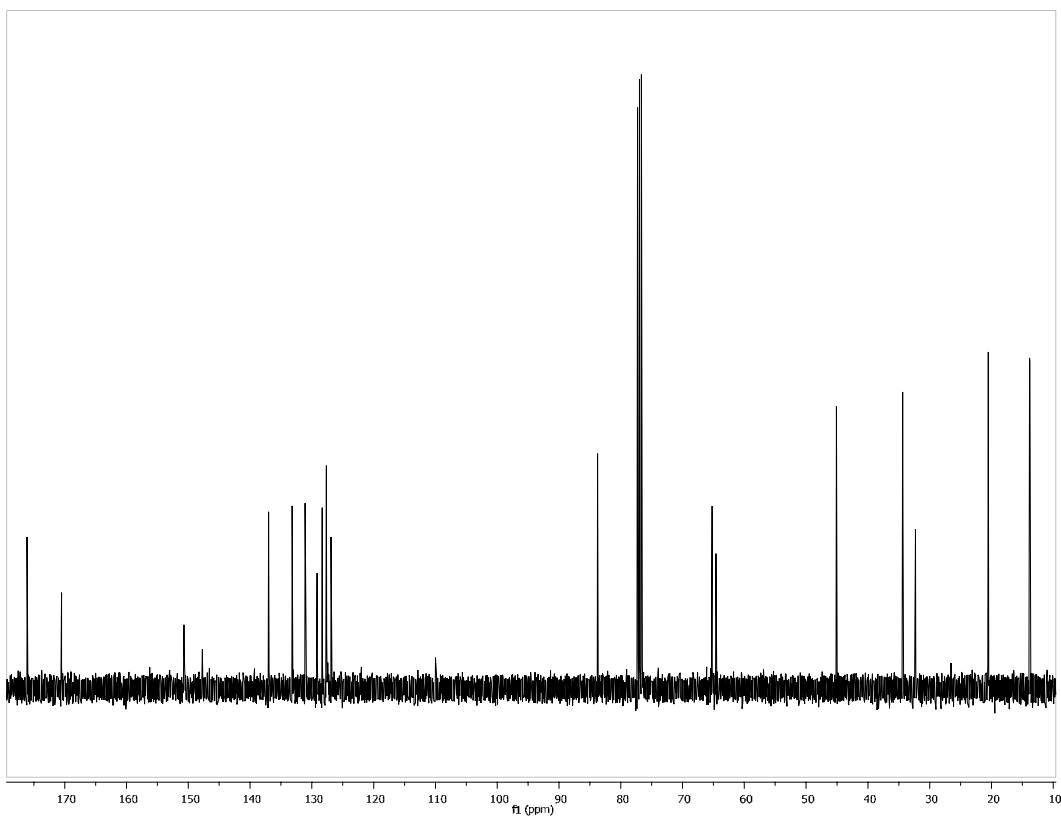

$^1\text{H}$  and  $^{13}\text{C}$  spectra of 12q-E

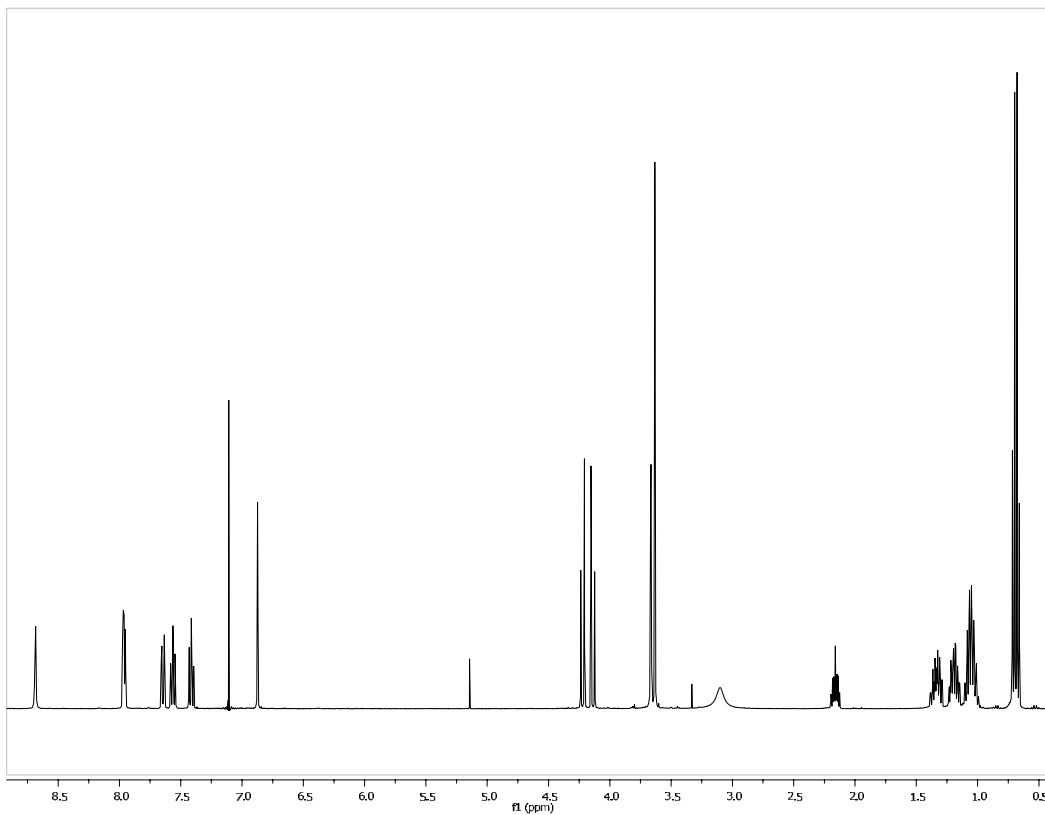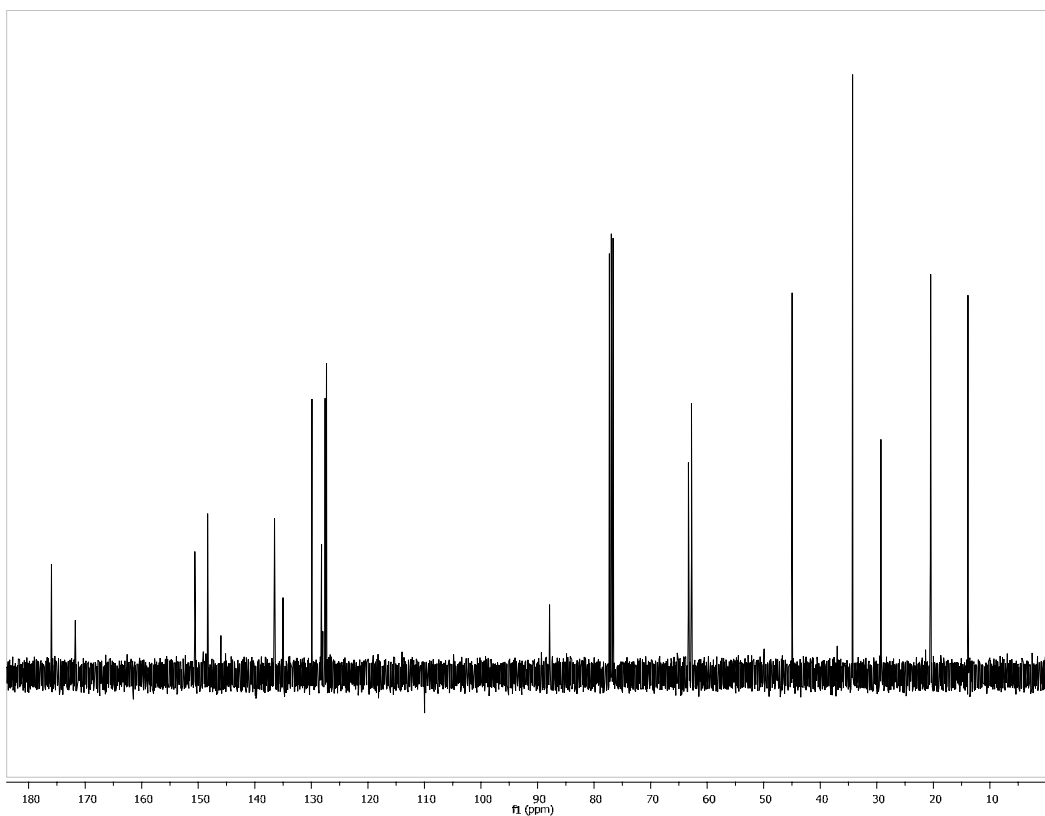

$^1\text{H}$  and  $^{13}\text{C}$  spectra of 12q-Z

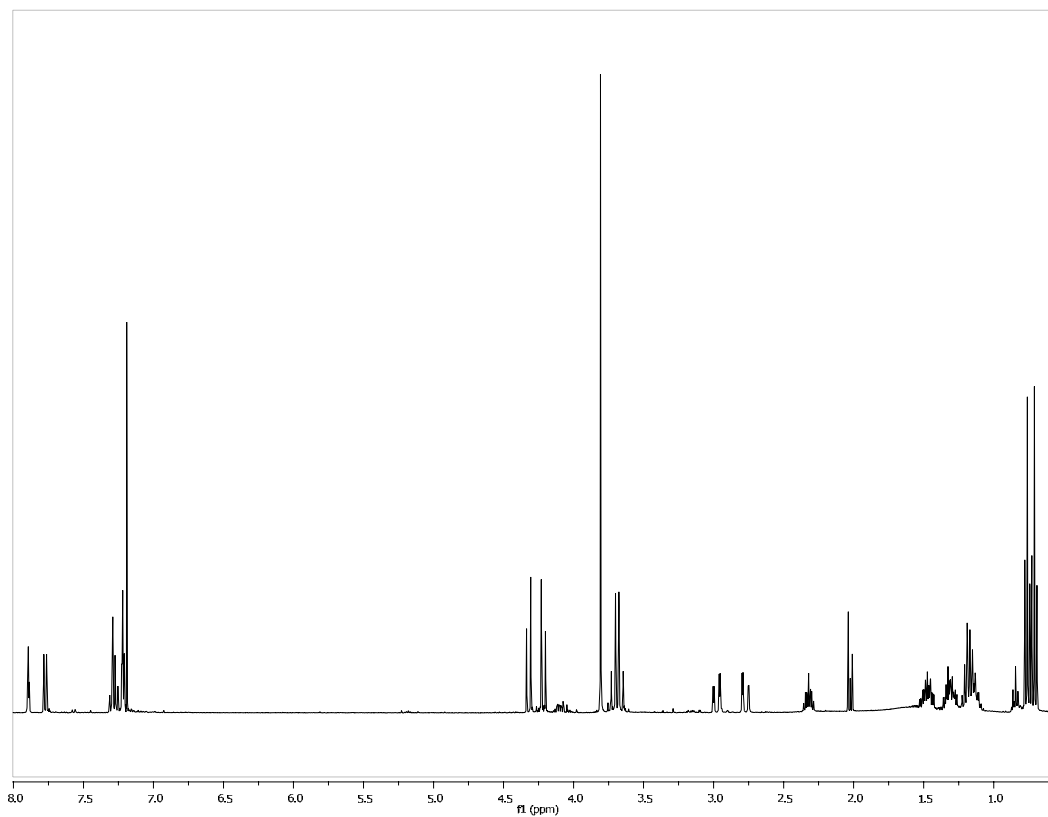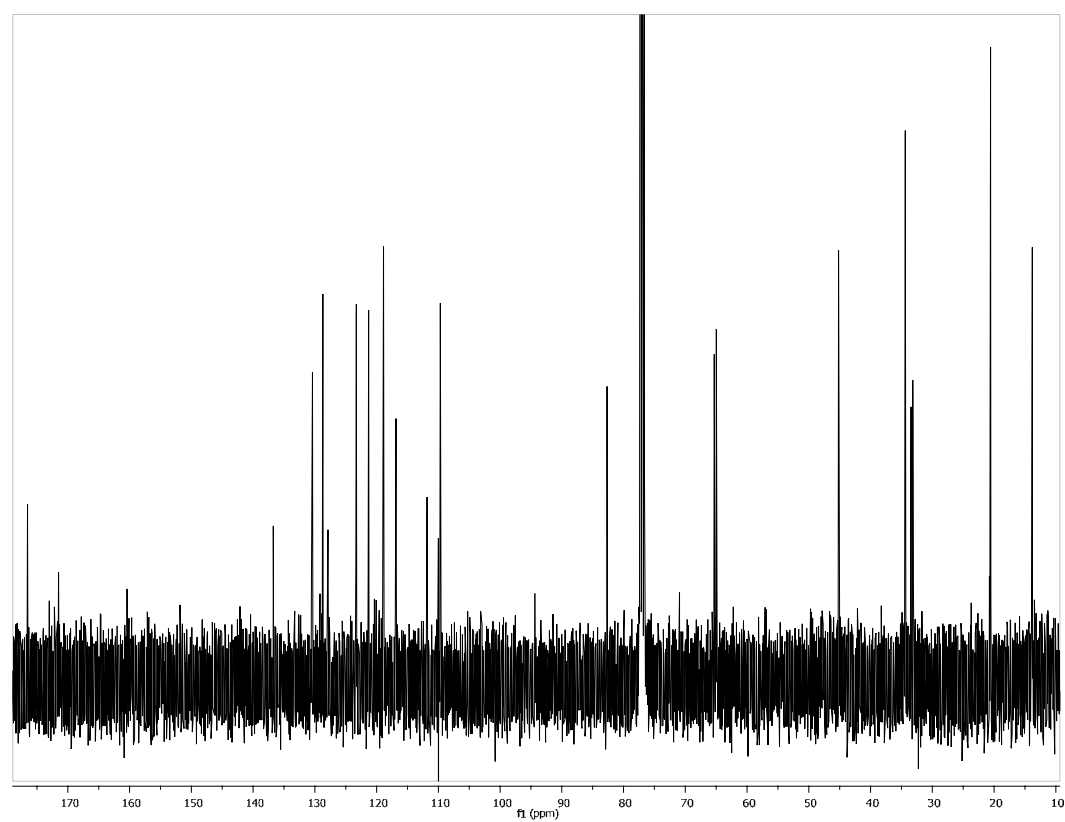

$^1\text{H}$  and  $^{13}\text{C}$  spectra of **12r-E**

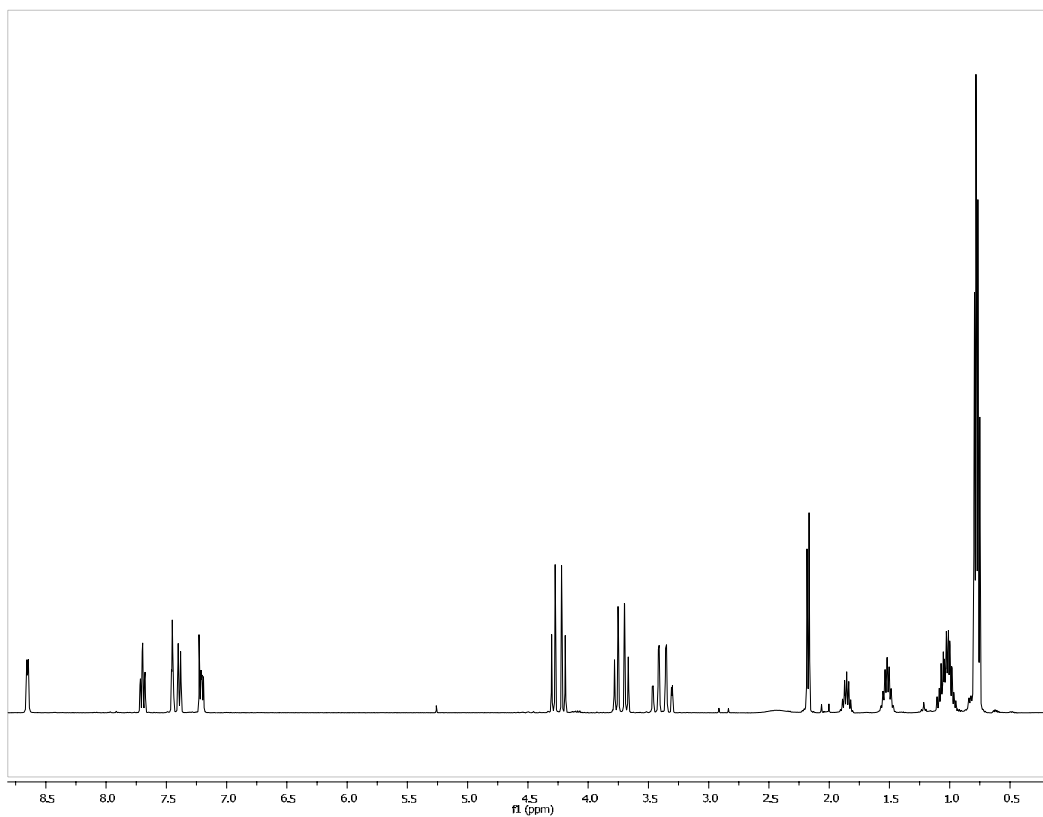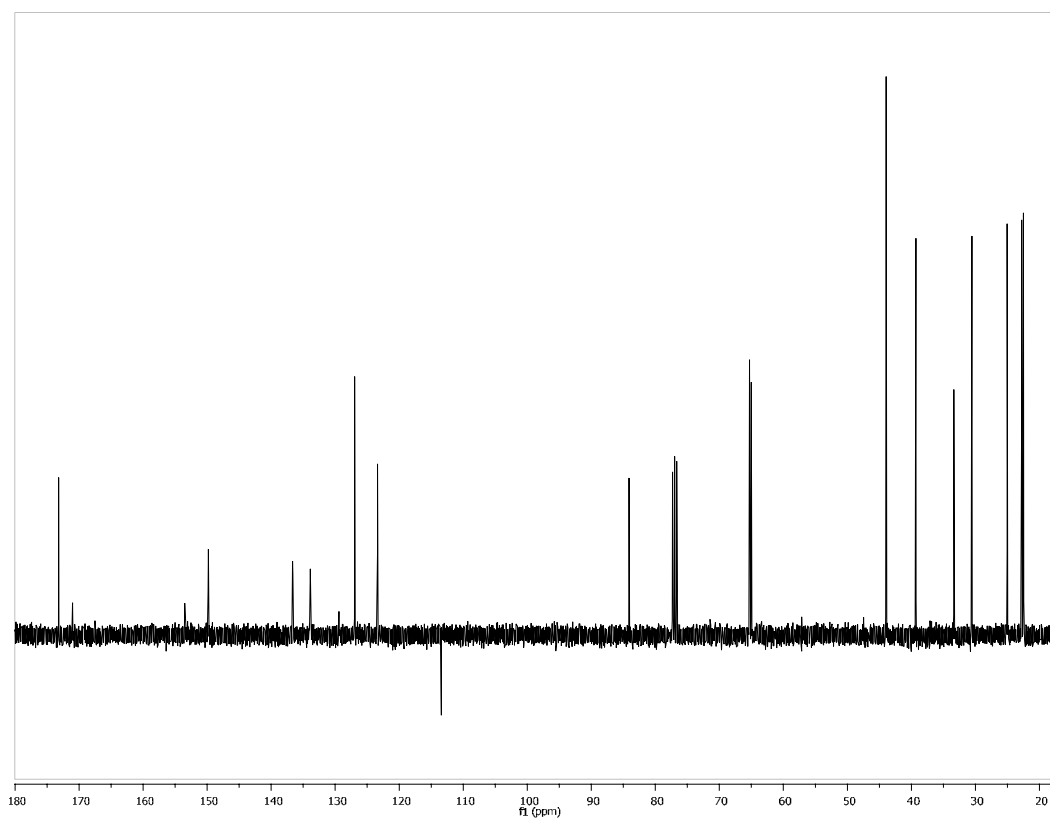

$^1\text{H}$  and  $^{13}\text{C}$  spectra of **12s-E**

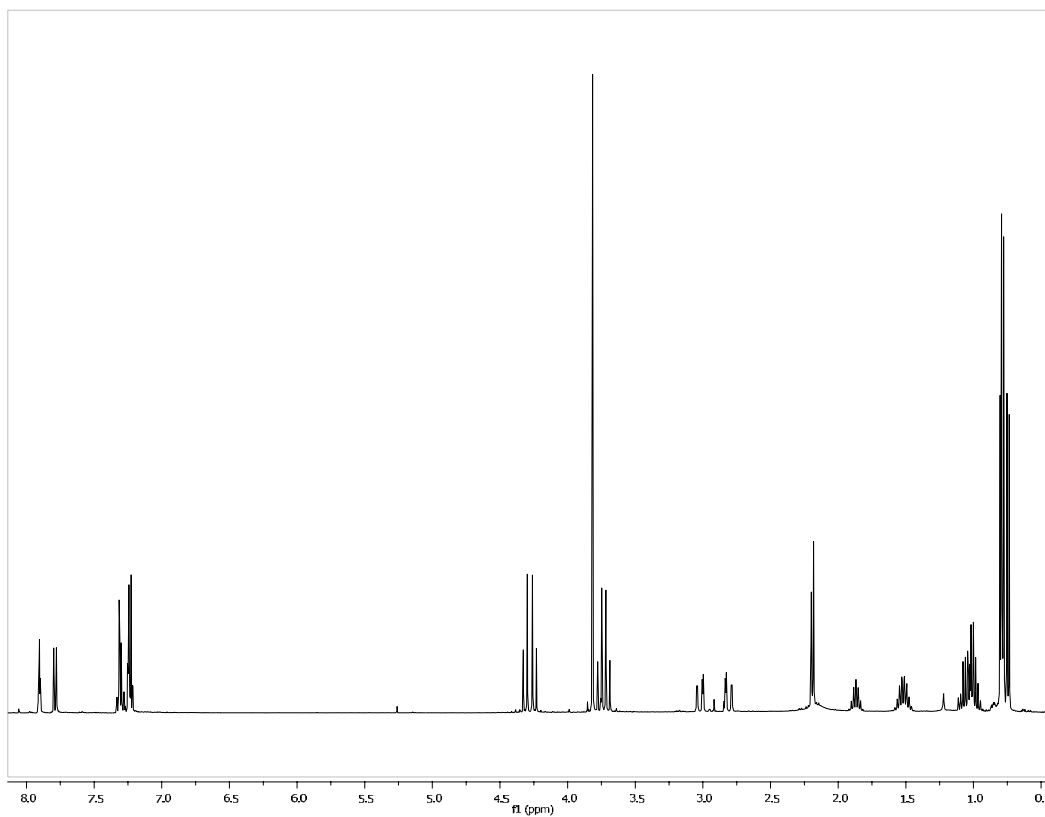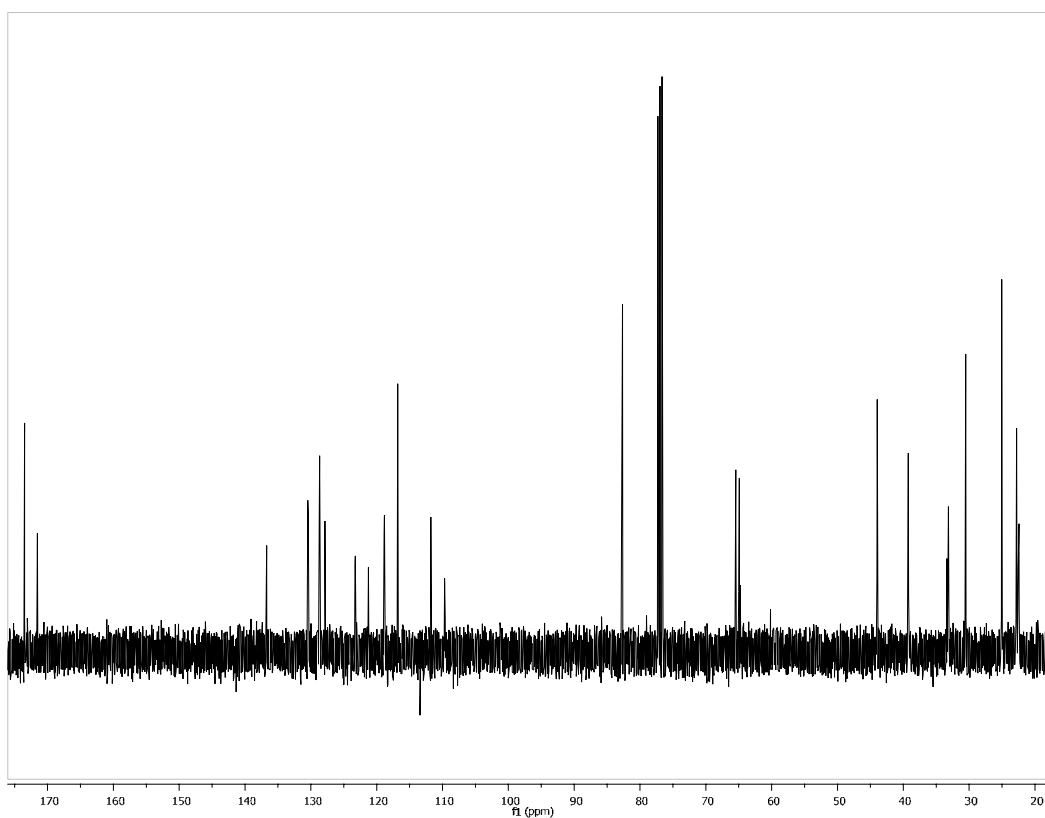

$^1\text{H}$  and  $^{13}\text{C}$  spectra of **12t-E**
